1 High glucose-induced ubiquitylation of G6PD leads to the injury of podocyte

2

3 Meng Wang<sup>1\*</sup>, Ji Hu<sup>2\*</sup>, Linling Yan<sup>3</sup>, Yeping Yang<sup>1</sup>, Min He<sup>1</sup>, Shizhe Guo<sup>1</sup>, Meng Wu<sup>2</sup>, Qin Li<sup>4</sup>, Wei  
4 Gong<sup>1</sup>, Yang Yang<sup>5</sup>, Diane E. Handy<sup>6</sup>, Bin Lu<sup>1,7</sup>, Chuanming Hao<sup>8</sup>, Qinghua Wang<sup>1,7,9</sup>, Yiming Li<sup>1,7</sup>,  
5 Ronggui Hu<sup>5</sup>, Robert C. Stanton<sup>10</sup>, Zhaoyun Zhang<sup>1,7</sup>

6

7 <sup>1</sup>Division of Endocrinology and Metabolism, Huashan Hospital, Fudan University, Shanghai 200040,  
8 China

9 <sup>2</sup>Department of Endocrinology, the Second Affiliated Hospital, Soochow University, Suzhou 215004,  
10 Jiangsu, China

11 <sup>3</sup>Department of Endocrinology, the First People's Hospital of Taicang, Jiangsu 215400, China

12 <sup>4</sup>Department of Endocrinology and Metabolism, Shanghai Ninth People's Hospital, Shanghai Jiaotong  
13 University, Shanghai 200040, China

14 <sup>5</sup>Institute of Biochemistry and Cell Biology, Shanghai Institutes for Biological Sciences, Shanghai  
15 200040, China

16 <sup>6</sup>Department of Medicine, Brigham and Women's Hospital, Harvard Medical School, Boston,  
17 Massachusetts 02215, USA

18 <sup>7</sup>Institute of Endocrinology and Diabetology, Fudan University, Shanghai 200040, China

19 <sup>8</sup>Division of Nephrology, Huashan Hospital, Fudan University, Shanghai 200040, China

20 <sup>9</sup>Keenan Research Centre for Biomedical Science, Division of Endocrinology and Metabolism, St.  
21 Michael's Hospital, Toronto, Ontario M5B1W8, Canada

22 <sup>10</sup>Research Division, Joslin Diabetes Center, Harvard Medical School, Boston, Massachusetts 02215,

23 USA

24

25 \*These authors contributed equally to this work.

26 **Correspondence:** Zhaoyun Zhang, M.D., Ph.D., Department of Endocrinology and Metabolism,

27 Huashan Hospital, Fudan University, 12 Wulumuqi Road, Shanghai 200040, China, Tel:

28 +86-21-52888286, E-mail: zhaoyunzhang@fudan.edu.cn

29

30 **Running headline:** G6PD ubiquitylation injures podocyte

31

32 **Keywords:** Glucose-6-phosphate dehydrogenase/ reactive oxygen species/ podocyte/ Ubiquitin

33 proteasome pathway/ VHL

34

35

36

37

38

39

40

41

42

43

44

45 **Abstract**

46 Oxidative stress contributes substantially to podocyte injury in diabetic kidney disease. The  
47 mechanism of hyperglycemia-induced oxidative stress in podocytes is not fully understood.  
48 Glucose-6-phosphate dehydrogenase is critical in maintaining NADPH, an important cofactor for  
49 antioxidant system. Here, we hypothesized that high glucose induces ubiquitylation and degradation  
50 of G6PD, which injures podocytes by reactive oxygen species (ROS) accumulation. We found that  
51 both G6PD protein expression and G6PD activity was decreased in kidneys of both diabetic patients  
52 and diabetic rodents. Overexpressing G6PD reversed redox imbalance and podocyte apoptosis  
53 induced by high glucose and palmitate. Inhibition of G6PD induced podocyte apoptosis. In G6PD  
54 deficient mice, podocyte apoptosis was also largely increased. High glucose had no effect on G6PD  
55 mRNA level but it caused decreased G6PD protein expression, which was mediated by the ubiquitin  
56 proteasome pathway. Furthermore, von Hippel–Lindau (VHL), an E3 ubiquitin ligase subunit, directly  
57 bound to G6PD and degraded G6PD through ubiquitylating G6PD on lysine residues 366/403. Our  
58 data suggest that high glucose induces ubiquitylation of G6PD by VHL, which leads to ROS  
59 accumulation and podocyte injury.

60

61

62

63

64

65

66 **Introduction**

67 Diabetic kidney disease (DKD) is the major cause of end-stage renal disease. Chronic hyperglycemia  
68 leads to the injury and dysfunction of podocytes, which plays an important role in the development  
69 and progression of DKD[1-3]. Due to the key role of podocytes in maintaining the glomerular  
70 filtration, recent studies have been focused on protecting against podocyte injury and loss in various  
71 glomerular diseases, including DKD. Currently, there are several agents under clinical investigation  
72 for the treatment of DKD targeting podocyte[4]. However, the underlying mechanisms as well as the  
73 pathogenesis of podocyte injury and loss remain largely unknown[5-8].

74 Recent studies have suggested that increased oxidative stress plays an important role in the podocyte  
75 injury and loss of DKD[9]. The accumulation of reactive oxidative species (ROS) is caused by the  
76 imbalance between processes that produce ROS and processes that reduce ROS. The antioxidant  
77 system is consisted of catalase, superoxide dismutase, glutathione system and thioredoxin system[10,  
78 11]. For both glutathione and thioredoxin systems, nicotinamide adenine dinucleotide phosphate  
79 (NADPH) is the required cofactor for the conversion of oxidized glutathione and thioredoxin to the  
80 reduced forms, which scavenge ROS. In addition, there is an allosteric binding site for NADPH in  
81 catalase. The binding of NADPH maintains catalase in its most active tetrameric conformation and  
82 protects it against the toxicity of hydrogen peroxide[12]. Thus, NADPH is a critical component for the  
83 antioxidant system.

84 Our and others' previous studies suggest that the pentose phosphate pathway (PPP) is the principal  
85 pathway for producing NADPH, in which glucose 6-phosphate dehydrogenase (G6PD) is the  
86 rate-limiting enzyme[13-16]. We and others have shown that high glucose decreases G6PD activity in

87 endothelial cells, pancreatic  $\beta$  cells, kidney tissue, liver tissue, and pancreas tissue, which leads to  
88 insufficient NADPH supply and thus the accumulation of ROS[16-21]. We also found that G6PD  
89 deficient mice had increased renal oxidative stress and elevated urinary albumin, which suggested that  
90 G6PD deficiency alone was sufficient to injure the glomerular filtration barrier[22]. However, the  
91 mechanism of high glucose-mediated decrease in G6PD activity is unknown. To address this  
92 important question, we investigated the regulatory mechanism(s) that affected G6PD in podocytes  
93 under hyperglycemia. Our findings suggest that hyperglycemia-induced ubiquitylation of G6PD is a  
94 major contributor to the injury and loss of podocytes, which might be a drug target for DKD  
95 treatment.

96

## 97 **Results**

### 98 *G6PD protein expression and activity was decreased in diabetic kidney*

99 In order to examine the expression of G6PD protein in diabetes mellitus, first we checked the renal  
100 cortex from non-diabetic subjects (n=3) and diabetic patients (n=3) by immunohistochemical (IHC)  
101 staining. Compared to non-diabetic subjects, the renal G6PD protein expression was decreased in  
102 diabetic patients (Figure 1A). Next, we explored G6PD level in different diabetic rodents including  
103 STZ-induced diabetic rats, STZ-induced diabetic mice and Akita mice (a model of type 1 diabetes).  
104 Compared to non-diabetic (NDM) controls, blood glucose was significantly increased in diabetic  
105 rodents (Figure EV1A, EV1B and EV1C). Meanwhile, G6PD protein expression in renal cortex was  
106 largely decreased in diabetic models (Figure 1B, 1C and 1D). Further, G6PD activity was examined.

107 As shown in Figure 1E, diabetic mice have lower G6PD activity in the renal cortex compared to  
108 NDM controls.

109

### 110 *G6PD expression was decreased in podocytes of diabetic kidney*

111 Podocytes line the outer aspect of the glomerular basement membrane (GBM) and are highly  
112 differentiated. Podocyte injury and loss indicates it's associated with the initiation and development of  
113 DKD. Whether low expression of G6PD is associated with podocyte injury and loss in DKD has not  
114 been illuminated. Wilms' tumor protein-1 (WT-1) is a specific marker for podocytes. To examine the  
115 podocyte number, immunofluorescence against WT-1 was performed. As shown in Figure 2A,  
116 compared to the NDM, the podocyte number, reflected by WT-1 positive staining, in renal cortex of  
117 DM was fewer. To examine the G6PD protein expression in podocytes in vivo, immunofluorescence  
118 co-staining of WT-1 and G6PD was performed in the kidney. Compared to NDM, G6PD protein  
119 expression in podocytes of diabetic mice was decreased (Figure 2B).

120

### 121 *High glucose and palmitate decreased G6PD protein expression and increased apoptosis of* 122 *podocyte*

123 Previous studies have shown that both high glucose and lipids such as palmitate could induce  
124 podocyte injury[23-25]. As shown in Figure 2, renal G6PD protein expression declined in podocytes,  
125 while the causal relationship with metabolic disturbances was unknown. We conducted in vitro  
126 studies in cultured podocytes using either high glucose or palmitate. Mannitol (M) was added as an  
127 osmotic control. Compared to cells cultured in normal glucose (5.6mM glucose), G6PD protein  
128 expression of podocytes in high glucose (25mM glucose) was significantly decreased (Figure 3A).

129 Meanwhile, increased apoptosis of podocytes was observed as reflected by increased expression of  
130 cleaved caspase-3 (Figure 3A). Similarly, palmitate also reduced the protein expression of G6PD and  
131 induced apoptosis of podocytes in a dose-dependent manner (Figure 3B).

132

### 133 ***Inhibition of G6PD increased apoptosis and loss of podocytes both in vitro and in vivo***

134 To elucidate whether G6PD deficiency per se affected podocytes survival, siRNA targeting to G6PD  
135 (siG6PD) was constructed to inhibit the expression of G6PD. Mouse podocytes were transfected with  
136 either siG6PD or scrambled siRNA (scramble) as a control (Figure 4A). Inhibition of G6PD increased  
137 apoptosis of podocytes (Figure 4B). To further determine if G6PD deficiency per se would affect the  
138 survival of podocytes in vivo, hemizygous (Hemi) G6PD deficient mice were employed in this study.  
139 Previous studies showed that G6PD activity in Hemi G6PD deficient mice dramatically decreased (by  
140 85%), as compared to the control mice[22, 26]. In order to clarify the indispensable role of G6PD in  
141 podocytes survival, renal cortex from Hemi G6PD deficient mice at different ages and age-matched  
142 littermate wild type mice were examined with IHC for WT-1. Compared to age-matched wild type  
143 mice, G6PD deficient mice at 9-week-old (9wk), 23-week-old (23wk) and 39-week-old (39wk) all  
144 showed decreased podocyte number in kidney (Figure 4C). Interestingly, as compared to 9wk G6PD  
145 deficient mice, 39wk G6PD deficient mice showed even fewer podocytes (Figure 4C), suggesting that  
146 longer duration of G6PD deficiency caused more podocytes loss. Further, immunofluorescence  
147 co-staining for both WT-1 and TUNEL assay was performed to evaluate the apoptosis of podocytes.  
148 Compared to age-matched wild type mice, TUNEL positive cells were increased in the Hemi G6PD  
149 deficient mice (Figure 4D).

150

151 ***Elevation of G6PD expression decreased the apoptosis of podocyte***

152 If high glucose or palmitate-induced decrease of G6PD protein plays a role in the survival of podocyte,  
153 overexpression of G6PD should reverse the apoptosis. To test this, podocytes were transfected with  
154 adenoviral G6PD vector (Ad-G6PD) to overexpress G6PD and apoptosis was examined. Empty  
155 vector adenoviruses (Ad-null) were used as a control. As shown in Figure 5, elevation of G6PD  
156 protein significantly decreased podocyte apoptosis induced by either high-glucose (Figure 5A) or  
157 palmitate (Figure 5B).

158

159 ***Elevation of G6PD protein expression reversed the redox imbalance caused by high glucose***

160 High glucose-induced increase of ROS in podocytes has been validated in previous studies[27, 28]. In  
161 order to elucidate the role of G6PD in high glucose-induced oxidative stress, we overexpressed G6PD  
162 in podocytes exposed to high glucose and examined parameters reflecting oxidative stress. Empty  
163 vector adenoviruses (Ad-null) were used as control. Compared to cells cultured in normal glucose,  
164 NADPH level in podocytes exposed to high glucose was significantly decreased, which was reversed  
165 by overexpressing G6PD (Figure 6A). NADPH is required for oxidized glutathione (GSSG) to be  
166 converted to reduced glutathione (GSH), a major component in antioxidant system. Thus, we checked  
167 the level of GSH/GSSG of podocytes and found that high glucose decreased GSH/GSSG, which was  
168 increased by G6PD overexpression (Figure 6B). As a consequence, high glucose-induced ROS  
169 accumulation in podocytes was found to be decreased by overexpressing G6PD (Figure 6C).

170

171 ***High glucose promoted G6PD protein degradation through the ubiquitin proteasome pathway***



172 To investigate the mechanism underlying high glucose or palmitate-induced decrease in G6PD protein  
173 level, we examined the G6PD mRNA level in podocytes under either high glucose or palmitate  
174 incubation condition. Notably, palmitate significantly decreased G6PD mRNA level (Figure 7A),  
175 while high glucose had no effect on it (Figure 7B). Furthermore, G6PD protein level was found to be  
176 decreased in podocytes exposed to high glucose for 72 hours (Figure 7C). Thus, the reduction of  
177 G6PD protein by high glucose was unlikely to be due to transcriptional regulation and might be  
178 associated with the protein degradation. As the ubiquitin (Ub) proteasome pathway (UPP) degraded  
179 the majority of intracellular proteins, we questioned whether this pathway was involved in decreasing  
180 G6PD protein induced by high glucose. To this end, MG132, a proteasome inhibitor, was added,  
181 which significantly rescued G6PD protein level in podocytes exposed to high glucose (Figure 7D). To  
182 confirm the ubiquitylation of G6PD, Flag-tagged G6PD (Flag-G6PD) and His-tagged ubiquitin  
183 (His-Ub) plasmids were constructed and validated in HEK293T cells (Figure EV2A and EV2B).  
184 Subsequently, Flag-G6PD and His-Ub constructs were co-transfected into HEK293T cells and  
185 anti-Flag M2 beads were used for immunoprecipitation (IP). Western blot analysis using anti-His  
186 antibody showed that G6PD was indeed ubiquitylated and the ubiquitylation was largely enhanced in  
187 the presence of MG132 (Figure 7E). These results indicated that high glucose-induced G6PD protein  
188 decrease depended on the ubiquitin proteasome pathway.

189

### 190 ***VHL ubiquitylated and degraded G6PD***

191 The E3 ubiquitin ligases are the major enzymes responsible for recognizing and linking ubiquitin to  
192 the target proteins. To identify the potential E3 ligase that ubiquitylated G6PD, we conducted yeast

193 two hybrid (Y2H) screening[29]. Specifically, human G6PD was employed as the bait to screen  
194 potential G6PD-interacting proteins from a Y2H prey library containing open reading frames from  
195 human cDNAs encoding over 400 putative ubiquitin ligases or their substrate binding subunits. We  
196 found that von Hippel–Lindau (VHL), a subunit of E3 ubiquitin ligase, interacted with G6PD in the  
197 Y2H system (Figure 8A). A VHL plasmid was constructed with an HA tag (HA-VHL) and was  
198 validated in HEK293T cells (Figure EV2C). The specific interaction between G6PD and VHL was  
199 verified with co-immunoprecipitation (CO-IP) assay. As shown in Figure 8B, Flag-G6PD and  
200 HA-VHL proteins formed a complex that survived the multistep procedures in CO-IP assay.  
201 Collectively, the specific interaction between VHL and G6PD was verified in the yeast two hybrid  
202 and CO-IP assay in cultured HEK293T cells, indicating that VHL was a G6PD-interacting protein.

203 To further examine whether VHL functioned as an E3 ubiquitin ligase against G6PD, the influence of  
204 VHL on G6PD protein abundance was determined. As shown in Figure 8C, G6PD protein level  
205 declined with the increased VHL protein expression. To further confirm the post-translational  
206 regulation of VHL on G6PD, cycloheximide (CHX), an inhibitor of protein synthesis, was used. As  
207 shown in Figure 8D, with the inhibition of protein synthesis by CHX, VHL also reduced G6PD  
208 protein stability. To further ascertain the functional interaction of VHL with G6PD, ubiquitylation of  
209 G6PD by VHL was explored under in vivo conditions. As shown in Figure 8E, G6PD was  
210 conspicuously polyubiquitylated when HA-VHL was expressed along with His-Ub. Furthermore, we  
211 assessed the effect of VHL knockdown on the G6PD protein. First, two siRNAs targeting to VHL  
212 (siVHL#1 and siVHL#2) were constructed. HEK293T cells were transfected with scrambled siRNA  
213 (scramble), siVHL#1 or siVHL#2 and G6PD protein level was analyzed. As shown in Figure 8F,

214 endogenous VHL was silenced efficiently by siVHL#2. The knockdown of VHL concomitantly  
215 resulted in the elevation of endogenous G6PD protein level (Figure 8F). These results suggested that  
216 VHL functioned as an E3 ubiquitin ligase against G6PD.

217

218 ***K<sup>366</sup> and K<sup>403</sup> in G6PD were the major sites for VHL-mediated ubiquitylation***

219 After an in vivo ubiquitylation reaction, ubiquitylated G6PD was enriched with anti-Flag M2  
220 beads and subjected to tryptic digestion, followed by mass spectra (MS) analysis. The attachment of  
221 ubiquitin to the side chain of a lysine (Lys) residue renders it resistant to trypsin cleavage, and tryptic  
222 digestion of ubiquitin (chains) attached to the site leaves a -Gly-Gly- group, originating from the C  
223 terminus of ubiquitin, on the side chain of the modified Lys[30]. Based on these signature features,  
224 ubiquitylation sites in G6PD were identified from tandem mass spectrometry (MS/MS) spectra.  
225 Altogether, we found that a total of 5 Lys residues (K<sup>97</sup>, K<sup>366</sup>, K<sup>403</sup>, K<sup>407</sup> and K<sup>408</sup>) were ubiquitylated  
226 by VHL (Figure 9A).

227 To examine which lysine residue(s) may be the main ubiquitylation sites, we generated G6PD mutants  
228 bearing single or double lysine-to-arginine (Lys-to-Arg) substitutions and polyubiquitylated G6PD  
229 was assessed. As shown in Figure 9B and 9C, compared with wild-type G6PD, Ub conjugation to  
230 G6PD mutants with either Lys366-to-Arg (K<sup>366R</sup>) substitution or Lys403-to-Arg (K<sup>403R</sup>) substitution  
231 was largely reduced. However, the ubiquitylation of the other G6PD mutants (K<sup>97R</sup>, K<sup>407R</sup> and K<sup>408R</sup>)  
232 was not significantly affected. Remarkably, Lys-to-Arg substitutions on both K<sup>366</sup> and K<sup>403</sup> sites  
233 (K<sup>366+403R</sup>) almost completely abolished the VHL-mediated ubiquitylation on G6PD (Figure 9C).

234

235 **Discussion**

236 The current study reveals the biochemical mechanism that high glucose promotes the degradation of  
237 G6PD protein through the ubiquitin proteasome pathway, which leads to podocyte injury. Further,  
238 VHL, an E3 enzyme subunit, plays a key role in the ubiquitylation and degradation of G6PD, which is  
239 an important anti-oxidant component.

240 The injury and loss of podocytes plays a critical role in the initiation and development of DKD, while  
241 the mechanisms are not fully revealed[31]. Here, our results show that G6PD protein level in both  
242 podocytes from diabetic patients and podocytes exposed to high glucose are significantly decreased,  
243 which may explain the injury and loss of podocytes in DKD.

244 G6PD is the rate-limiting enzyme in the pentose phosphate pathway, which plays a critical role in cell  
245 growth by providing NADPH for redox regulation[32, 33]. Cells with normal G6PD activity keep the  
246 net ROS production at a reasonably low level. However, G6PD deficiency will cripple the antioxidant  
247 defense, resulting in the build-up of oxidative damage. Previously, we and others showed that G6PD  
248 deficiency led to increased accumulation of ROS in many cell types, which impaired the cellular  
249 function and survival[18, 21]. In this study, we reported, for the first time, that high glucose-induced  
250 G6PD deficiency in podocytes resulted in increased ROS accumulation and apoptosis, which could be  
251 rescued by overexpressing G6PD. We previously demonstrated that non-diabetic G6PD deficient  
252 mice had increased urinary albuminuria[22] and here in the same mouse model, we reported that  
253 G6PD deficiency led to significant podocyte loss due to increased apoptosis. Since podocytes are  
254 terminally differentiated epithelial cells, the loss of podocytes would eventually lead to the increased

255 urinary albuminuria. The above results demonstrated that G6PD played vital roles in maintaining the  
256 survival and function of podocyte.

257 Due to the decrease of G6PD induced by high glucose, NADPH and GSH levels were decreased,  
258 which resulted in the depletion of glutathione stores and enhanced oxidative stress. Further support for  
259 the role of G6PD in regulation of NADPH and GSH was that overexpression of G6PD conferred  
260 protection on podocytes exposed to high glucose. There is accumulating evidence to support this  
261 finding in other cell types. Mouse embryonic fibroblasts cells with increased G6PD level are more  
262 resistant to the oxidant tert-butyl hydroperoxide than cells with low G6PD activity[34]. Our previous  
263 studies have shown overexpressing G6PD prevents the high glucose-mediated ROS accumulation in  
264 both endothelial cell and pancreatic  $\beta$  cells[18, 21]. As for the antioxidant defense of podocytes,  
265 previous studies have proven that leukemia inhibitory factor protects against the high glucose-induced  
266 podocyte apoptosis through inhibiting oxidative stress[35]. Inhibiting the epidermal growth factor  
267 receptor in podocytes can decrease high glucose-induced ROS production[36]. Here, we demonstrate  
268 that in podocytes, G6PD is also critical in promoting cellular resistance to oxidative stress induced by  
269 hyperglycemia.

270 Work from others have reported that G6PD expression was up-regulated in pancreatic islets, adipose  
271 tissue and liver of diabetic animals and the over-activation of G6PD would stimulate ROS  
272 production[37-40]. The disparity between their work and our findings suggest that the expression of  
273 G6PD in various tissues may respond to hyperglycemia differently and either G6PD over-activation  
274 or deficiency would induce the accumulation of ROS by distinct mechanisms depending on the cell  
275 type.

276 G6PD is subject to complex regulation, and modifications of G6PD protein have been reported[15, 41,  
277 42]. It has been proven that G6PD acetylation on K<sup>403</sup> affects the formation of active dimers, which  
278 decreases G6PD activity[15]. Conversely, two other studies have reported that glycosylation on serine  
279 84 and sirtuin 5-associated deglutarylation of G6PD increase G6PD activity[41, 42]. In this study, we  
280 present a novel finding for the regulation of G6PD protein. We verified that K<sup>366</sup> and K<sup>403</sup> in G6PD  
281 were the major sites for VHL-mediated ubiquitylation. The ubiquitylation of G6PD on K<sup>97</sup> was also  
282 suggested in previous studies based on mass spectrometry analysis, while no functional validation was  
283 performed[30, 43]. Work from us and Wang *et al* showed that the modifications on K<sup>403</sup> decreased  
284 G6PD activity through different mechanisms. We revealed that ubiquitylation on K<sup>403</sup> promoted  
285 G6PD protein degradation, while Wang *et al* validated that acetylation on K<sup>403</sup> impaired the formation  
286 of active dimer. This further suggests that K<sup>403</sup>, an evolutionarily conserved residue, is very critical for  
287 maintaining the spatial conformation and protein stabilization of G6PD.

288 VHL gene is on the short arm of chromosome 3 (3p25–26)[44]. Through forming the VCB-Cul2  
289 complex including elongin B, elongin C, and Cullin 2, the VHL protein is part of an E3 ubiquitin  
290 ligase[45]. Inactivation of VHL is associated with several tumors, such as sporadic renal clear cell  
291 carcinomas and pancreatic neuroendocrine tumors[46, 47]. In addition, studies have reported that  
292 specific deletion of VHL in pancreatic  $\beta$  cell results in impaired glucose stimulated insulin secretion,  
293 indicating that VHL may participate in the pathogenesis of diabetes[48-50]. Additionally, it was  
294 observed that podocyte-specific VHL knockout led to rapid progressive glomerulonephritis, which  
295 was attributed to the increased hypoxia-inducible transcription factor-1 $\alpha$ , the most well-known target  
296 protein of VHL[51]. There were 5 other identified VHL target proteins, including extracellular

297 signal-regulated kinase 5[52], sprouty2[53],  $\beta_2$ -adrenergic receptor[54], I $\kappa$ B kinase- $\beta$ [55] and  
298 ceramide kinase like protein[56]. However, the potential role of VHL in the pathogenesis of diabetic  
299 kidney disease has not been determined. Here, for the first time, we show that G6PD is a novel target  
300 protein of VHL and VHL / G6PD axis plays an important role in maintaining the function and  
301 survival of podocytes in DKD. Taken together, it is enticing to further explore the potential role of  
302 VHL / G6PD as a new therapeutic target for diabetic kidney disease.

303

## 304 **Materials and Methods**

### 305 **Human renal biopsy samples**

306 Renal tissue samples were obtained from 3 diabetic patients who underwent renal biopsy in Division  
307 of Nephrology of Huashan Hospital and had been confirmed to have pathological and clinical findings  
308 consistent with diabetic kidney disease. All participants provided written informed consent, which  
309 was approved by the ethics committee at Huashan Hospital (KY2016-394). Normal human kidney  
310 tissues (n=3) without diabetes or renal disease were obtained via autopsy.

311

### 312 **Animal study**

313 The G6PD-deficient mouse model was recovered in the offspring of 1-ethyl-nitrosourea-treated male  
314 mice on a C3H murine background by Pretsch *et al*[26]. Later, Sanders *et al* showed that there was a  
315 single-point mutation (A to T transversion) in the 5' splice site consensus sequence at the 3' end of  
316 the exon 1[57]. The mice were bred at Brigham and Women's Hospital and Harvard Medical School  
317 from frozen embryos obtained from the Medical Research Council. This animal model was previously

318 characterized, and mice were genotyped by polymerase chain reaction as described previously[58].  
319 Hemizygous (Hemi) G6PD-deficient male mice, which had 15% of wild type G6PD activity, and  
320 age-matched wild type C3H control mice, aged 9wk, 23wk and 39wk, respectively, were used.

321 Male Sprague-Dawley rats (SLRC Laboratory Animal) weighing 240–260g were maintained on a  
322 standard chow with free access to water. Rats were randomly divided into control and diabetic groups.  
323 Diabetes was induced by an intraperitoneal injection (ip) of streptozotocin (STZ) (Sigma) in citrate  
324 buffer (0.1mol/l, pH4.5) with a dose of 55mg/kg body weight. The non-diabetic (NDM) control group  
325 received injection of citrate buffer alone. Blood glucose level was measured 7 days after STZ  
326 injection, and the rats with blood glucose level higher than 16.7mmol/L were considered diabetic.  
327 Rats were sacrificed 12 weeks after the onset of diabetes.

328 5-week-old male DBA/2J mice (SLRC Laboratory Animal) were made diabetic after injected with  
329 STZ (50mg/kg, ip) on 5 consecutive days. Hyperglycemia was confirmed when the blood glucose  
330 level reached 16.7mmol/L at 1-week post-injection. Mice were sacrificed 12 weeks after the onset of  
331 diabetes.

332 Male DBA/2J genetic background Akita mice bearing *Ins2<sup>+/C96Y</sup>* mutation[59] from The Jackson  
333 Laboratory were maintained on standard chow and had free access to water. Wild type littermates  
334 were used as non-diabetic controls. Mice were sacrificed at 6 months old.

335 All animal experiments were approved by the Institutional Animal Care and Use Committee at  
336 Harvard Medical School or Fudan University and conducted in accordance with the Guide for the  
337 Care and Use of Laboratory Animals published by the US National Institutes of Health (NIH  
338 Publication No. 85-23, revised 1996).



339

340 **Cell culture**

341 Conditionally immortalized mouse podocytes were cultured as described previously[60]. Podocytes  
342 were exposed to RPMI 1640 (Gibco) medium containing different concentrations of either glucose  
343 (5.6mM, 25mM or 5.6mM supplemented with 19.4mM mannitol) or palmitate (125µM, 250µM or  
344 500µM).

345 Human embryonic kidney (HEK293T) cells were maintained in Dulbecco's Modified Eagle Medium  
346 (Gibco) supplemented with 10% fetal bovine serum.

347

348 **siRNA transfection**

349 Cells were seeded into 6-well plates and grown until 60–80% confluent. siRNA for G6PD or VHL  
350 was transfected with lipofectamine TM RNAiMAX Transfection Reagent (Invitrogen) following the  
351 recommended protocol.

352 The sequences designed for inhibiting G6PD gene expression were  
353 5'-AAUCAACUGUCGAACCACAtt-3' and 3'-UGUGGUUCGACAGUUGAUUgg-5'.

354 A scrambled siRNA (4390846, Invitrogen) without biological effects was used as control.

355 The sequences designed for inhibiting VHL gene expression were listed below:

356 siVHL#1 were 5'-GCUCUACGAAGAUCUGGAAdTdT-3' and  
357 3'-UUCCAGAUCUUCGUAGAGCdTdT-5';

358 siVHL#2 were 5'-GCAUUGCACAUCAACGGAUdTdT-3' and  
359 3'-AUCCGUUGAUGUGCAAUGCdTdT-5'.

360 The control siRNA for VHL was obtained from Biotend (N100, Biotend).

361

### 362 **Adenoviral vector construction**

363 Human G6PD cDNA was excised from pCMV-XL4-G6PD (OriGene) and was confirmed by  
364 sequencing. The adenoviral-hG6PD expression vector was constructed as described previously[21].

365 MOI 10 was used for all experiments. Empty vector was used for control experiments.

366

### 367 **Real-time PCR analysis**

368 Real-time PCR was performed as described before[61]. Total RNA was extracted from podocytes  
369 with TRIzol Reagent (Invitrogen) and was converted to cDNA according to the manufacturer's  
370 protocol (G490, ABM). The sequences of the primers used were listed below:

371 mouse G6PD were 5'-CAGCGGCAACTAAACTCAGAA-3' and

372 3'-GCATAGCCCACAATGAAGGT-5';

373 mouse  $\beta$ -actin were 5'-CACGATGGAGGGGCCGACTCATC-3' and

374 3'-TAAAGACCTCTATGCCAACACAGT-5'.

375

### 376 **Western Blot**

377 Cells were lysed with lysis buffer containing protease inhibitor cocktail (Roche). The membranes  
378 were incubated with antibodies to G6PD (Bethyl Laboratories), cleaved caspase-3 (Cell Signaling  
379 Technology),  $\beta$ -actin (Santa Cruz Biotechnology), GAPDH (Santa Cruz Biotechnology), anti-HA  
380 antibody (Sigma), anti-Flag antibody (Sigma) and anti-His antibody (Cell Signaling Technology).

381

382 **Measurement of oxidative stress markers**

383 Measurement of NADPH, GSH/GSSG and ROS was performed as described before[18, 21]. NADPH  
384 was measured by a colorimetric method according to the manufacturer's instructions (Bioassay  
385 System). GSH/GSSG was measured by a spectrophotometric method according to the manufacturer's  
386 instructions (Cayman). ROS production was measured with the cell-permeable, oxidation-sensitive  
387 dye CM-H<sub>2</sub>DCFDA (Invitrogen). Fluorescence was read with a microplate fluorometer (Victor2  
388 fluorometer, PerkinElmer). After reading, cells were lysed to measure protein concentration, which  
389 was used to normalize the readings.

390

391 **Immunohistochemistry**

392 Expression of WT-1 was examined on paraffin-embedded renal tissue section with 1:100 dilution of  
393 WT-1 antibody (Santa Cruz Biotechnology). The number of WT-1 positive stained cells per  
394 glomerular cross-section area in the kidney sections was analyzed as described previously[62].

395

396 **Immunofluorescence**

397 Immunofluorescence staining of paraffin blocks was applied to assess the expression of WT-1 and  
398 G6PD in renal tissue section with WT-1 antibody (Santa Cruz Biotechnology, 1:100) and G6PD  
399 antibody (Proteintech Group, 1:200).

400

401 **TUNEL analysis**

402 The terminal deoxynucleotidyl transferase-mediated dUTP nick end-labeling (TUNEL) staining was  
403 carried out on 4-mm-thick paraffin-embedded sections using a cell death detection assay kit  
404 according to the manufacturer's instructions (Roche). Samples were evaluated under a Nikon Eclipse  
405 ci-L fluorescence microscope (Nikon, Japan).

406

#### 407 **Yeast two hybrid screen**

408 The yeast two hybrid (Y2H) screening was carried out to screen for E3 ubiquitin ligases that may  
409 ubiquitylate G6PD. We utilized the GAL4-based yeast two-hybrid system (Y2H, Invitrogen) to screen  
410 for and analyze the protein-protein interaction in yeast as described before[63]. The full length of  
411 G6PD open reading frame was first cloned in donor vector pDONR221 and then transferred into  
412 pDEST32 through Gateway cloning reaction (Invitrogen), generating the bait plasmid,  
413 pDEST32-G6PD, which contained the in-frame fusion of GAL4 DNA binding domain. The prey  
414 vector pDEST22 containing human cDNA collections in-frame fused to the GAL4 activating domain  
415 (Invitrogen). Using the empty pDEST22 plasmid as a negative prey control, Y2H screening was  
416 performed by transforming yeast strain (Mav203 strain) that harbored bait vector, pDEST32-G6PD,  
417 with the prey vectors for human E3 cDNA expression library. Yeast transformants were first grown  
418 on to the agar plate on SD-2 (deficient in Leucine and Tryptophan) for selecting yeast cells containing  
419 both bait and prey vectors, and then transferred to SD-4 (deficient in Leucine, Tryptophan, Histidine,  
420 and Uracil) plates to screen for proteins that potentially interacted with human G6PD. Colonies grown  
421 on the SD-4 plates were picked and streaked onto another SD-4 plates with X-Gal  
422 (5-Bromo-4-chloro-3-indolyl  $\beta$ -D-galactopyranoside, Sigma) added. "Positive" colonies were scored

423 for those which not only grew in SD-4 medium but also presented blue color in X-Gal staining assay  
424 for  $\beta$ -galactosidase activity. The prey vectors were recovered from the positive colonies and  
425 sequenced after amplification in *E. coli*. Each interaction was confirmed by transforming yeast  
426 Mav203 cells with the indicated bait and prey vectors. The transformants grew on the SD-2 or SD-4  
427 agar plates (with or without X-Gal) for approximately 3 days at 30 °C. Images of the colonies on both  
428 plates were recorded.

429

### 430 **Immunoprecipitation (IP) and immunoblotting (IB)**

431 HEK293T cells were transiently transfected with indicated expression plasmids with lipofectamine™  
432 2000 Transfection Reagent (Invitrogen). Usually, cells were harvested 48 hours after transfection and  
433 washed twice with ice-cold PBS buffer. Cells were then sonicated in IP buffer [20mM Tris-Cl,  
434 150mM NaCl, 1mM EDTA, 1mM EGTA, 1% (v/v) Triton X-100, 2.5mM sodium pyrophosphate,  
435 1mM  $\beta$ -glycerolphosphate, 1mM Na<sub>3</sub>VO<sub>4</sub>, and protease inhibitor cocktail (Roche), pH7.5] by  
436 Bioruptor UCD-200 (Diagenode) and then centrifuged at 22,500g at 4°C for 15 min. Expression of the  
437 indicated proteins in the lysates was checked by immunoblotting with relevant antibodies to normalize  
438 total input amounts. After normalization, the supernatants were each incubated with equal amounts of  
439 anti-Flag M2 beads overnight at 4°C. The anti-Flag M2 beads and interacting proteins were pelleted  
440 and washed three times with IP buffer before boiling in 1X SDS-PAGE sample. The boiled samples  
441 were then resolved in SDS-PAGE and subjected to immunoblotting analysis with indicated  
442 antibodies.

443

444 **In vivo ubiquitylation assay**

445 To check the ubiquitylation status of G6PD, Flag-G6PD was immunoprecipitated from the cells  
446 treated with proteasome inhibitor MG132. For Figure 7E and Figure 8E, HEK293T cells were  
447 transiently transfected with indicated expression plasmids with lipofectamine<sup>TM</sup> 2000 Transfection  
448 Reagent (Invitrogen). After cells were harvested, IP experiments were carried out in RIPA buffer  
449 [50mM Tris-Cl, pH7.4, 150mM NaCl, 5mM EDTA, 1% (v/v) Triton X-100, 0.5% sodium  
450 pyrophosphate, 0.1% SDS, and protease inhibitor cocktail (Roche)]. The cell lysates were centrifuged  
451 at 22, 500g at 4°C for 15 min. The supernatants were subjected to immunoblotting to confirm the  
452 expression of each protein or incubation with anti-Flag M2 beads overnight at 4°C. The recovered  
453 beads were then washed three times and finally boiled in 1X SDS-PAGE sample loading buffer,  
454 followed by SDS-PAGE and immunoblotted using anti-His.

455

456 **Mass Spectrometry Analysis**

457 Samples were prepared with the same protocols as described at in vivo ubiquitylation assay. After the  
458 supernatants were incubated with anti-Flag M2 beads overnight at 4°C and washed three times, the  
459 protein was eluted by Flag peptide (ApexBio technology). Sample analysis was performed on  
460 nano-scale HLPC-MS system as described previously[63].

461

462 **Statistical analyses**

463 All data were expressed as mean±sd from three independent experiments. Statistical analysis was  
464 performed with a two-tailed unpaired Student's t-test. The *P* value less than 0.05 was considered  
465 statistically significant.

466

467

468

469

470

471

472

473

474

475

476

477

478

479

480

481

482

483

484 **Acknowledgements**

485 We thank Zhihong Yang at Joslin Diabetes Center for supplying podocytes to us. Thank Min Zhang in  
486 Division of Nephrology of Huashan Hospital for cell culturing guidance. Thank Wei Huang at Fudan  
487 University for helpful comments with the manuscript. We also acknowledge the excellent support  
488 from all members of Ronggui Hu's laboratory. In addition, this study was supported by the grants  
489 from National Natural Science Foundation of China (no.81370938, no.81471041 and no.81400796).

490

491 **Author contributions**

492 ZYZ conceived the original idea of this study. JH, RCS and ZYZ designed experiments. MW, LLY,  
493 YPY, SZG, MW and YY collected samples and performed experiments. MW, JH, MH, WJL, QL,  
494 WG, YA, BL, CMH, QHW, YML, RGH, RCS and ZYZ analyzed and interpreted the data. DEH  
495 provided mouse model. MW, RCS, QHW, DEH and ZYZ prepared the manuscript with suggestions  
496 from all other authors.

497

498 **Conflict of interest**

499 All the authors declared no competing interests.

500

501

502

503

504



505           **References**

- 506   1.   Pagtalunan ME, Miller PL, Jumping-Eagle S, Nelson RG, Myers BD, Rennke HG, Coplon NS, Sun L, Meyer  
507   TW (1997) Podocyte loss and progressive glomerular injury in type II diabetes. *The Journal of clinical*  
508   *investigation* **99**: 342-8
- 509   2.   Toyoda M, Najafian B, Kim Y, Caramori ML, Mauer M (2007) Podocyte detachment and reduced  
510   glomerular capillary endothelial fenestration in human type 1 diabetic nephropathy. *Diabetes* **56**: 2155-60
- 511   3.   Weil EJ, Lemley KV, Mason CC, Yee B, Jones LI, Blouch K, Lovato T, Richardson M, Myers BD, Nelson RG  
512   (2012) Podocyte detachment and reduced glomerular capillary endothelial fenestration promote kidney  
513   disease in type 2 diabetic nephropathy. *Kidney international* **82**: 1010-7
- 514   4.   Reiser J, Gupta V, Kistler AD (2010) Toward the development of podocyte-specific drugs. *Kidney*  
515   *international* **77**: 662-8
- 516   5.   Anil Kumar P, Welsh GI, Saleem MA, Menon RK (2014) Molecular and cellular events mediating glomerular  
517   podocyte dysfunction and depletion in diabetes mellitus. *Frontiers in endocrinology* **5**: 151
- 518   6.   Giacco F, Brownlee M (2010) Oxidative stress and diabetic complications. *Circulation research* **107**:  
519   1058-70
- 520   7.   Stanton RC (2011) Oxidative stress and diabetic kidney disease. *Current diabetes reports* **11**: 330-6
- 521   8.   Forbes JM, Coughlan MT, Cooper ME (2008) Oxidative stress as a major culprit in kidney disease in  
522   diabetes. *Diabetes* **57**: 1446-54
- 523   9.   Kitada M, Ogura Y, Koya D (2016) Rodent models of diabetic nephropathy: their utility and limitations. *Int J*  
524   *Nephrol Renovasc Dis* **9**: 279-290
- 525   10. Johnson SA, Spurney RF (2015) Twenty years after ACEIs and ARBs: emerging treatment strategies for  
526   diabetic nephropathy. *American journal of physiology Renal physiology* **309**: F807-20
- 527   11. Mahmood DF, Abderrazak A, El Hadri K, Simmet T, Rouis M (2013) The thioredoxin system as a therapeutic  
528   target in human health and disease. *Antioxidants & redox signaling* **19**: 1266-303
- 529   12. Kirkman HN, Rolfo M, Ferraris AM, Gaetani GF (1999) Mechanisms of protection of catalase by NADPH.  
530   Kinetics and stoichiometry. *The Journal of biological chemistry* **274**: 13908-14
- 531   13. Leopold JA, Zhang YY, Scribner AW, Stanton RC, Loscalzo J (2003) Glucose-6-phosphate dehydrogenase  
532   overexpression decreases endothelial cell oxidant stress and increases bioavailable nitric oxide. *Arteriosclerosis,*  
533   *thrombosis, and vascular biology* **23**: 411-7
- 534   14. Filosa S, Fico A, Paglialunga F, Balestrieri M, Crooke A, Verde P, Abrescia P, Bautista JM, Martini G (2003)  
535   Failure to increase glucose consumption through the pentose-phosphate pathway results in the death of  
536   glucose-6-phosphate dehydrogenase gene-deleted mouse embryonic stem cells subjected to oxidative stress.  
537   *The Biochemical journal* **370**: 935-43
- 538   15. Wang YP, Zhou LS, Zhao YZ, Wang SW, Chen LL, Liu LX, Ling ZQ, Hu FJ, Sun YP, Zhang JY, *et al.* (2014)  
539   Regulation of G6PD acetylation by SIRT2 and KAT9 modulates NADPH homeostasis and cell survival during  
540   oxidative stress. *The EMBO journal* **33**: 1304-20
- 541   16. Tao R, Zhao Y, Chu H, Wang A, Zhu J, Chen X, Zou Y, Shi M, Liu R, Su N, *et al.* (2017) Genetically encoded  
542   fluorescent sensors reveal dynamic regulation of NADPH metabolism. *Nature methods* **14**: 720-728
- 543   17. Xu Y, Osborne BW, Stanton RC (2005) Diabetes causes inhibition of glucose-6-phosphate dehydrogenase  
544   via activation of PKA, which contributes to oxidative stress in rat kidney cortex. *American journal of physiology*  
545   **289**: F1040-7

- 546 18. Zhang Z, Liew CW, Handy DE, Zhang Y, Leopold JA, Hu J, Guo L, Kulkarni RN, Loscalzo J, Stanton RC (2010)  
547 High glucose inhibits glucose-6-phosphate dehydrogenase, leading to increased oxidative stress and beta-cell  
548 apoptosis. *FASEB journal : official publication of the Federation of American Societies for Experimental Biology*  
549 **24**: 1497-505
- 550 19. Diaz-Flores M, Ibanez-Hernandez MA, Galvan RE, Gutierrez M, Duran-Reyes G, Medina-Navarro R,  
551 Pascoe-Lira D, Ortega-Camarillo C, Vilar-Rojas C, Cruz M, *et al.* (2006) Glucose-6-phosphate dehydrogenase  
552 activity and NADPH/NADP+ ratio in liver and pancreas are dependent on the severity of hyperglycemia in rat.  
553 *Life sciences* **78**: 2601-7
- 554 20. Zhang W, Ni C, Sheng J, Hua Y, Ma J, Wang L, Zhao Y, Xing Y (2013) TLQP-21 protects human umbilical vein  
555 endothelial cells against high-glucose-induced apoptosis by increasing G6PD expression. *PLoS one* **8**: e79760
- 556 21. Zhang Z, Yang Z, Zhu B, Hu J, Liew CW, Zhang Y, Leopold JA, Handy DE, Loscalzo J, Stanton RC (2012)  
557 Increasing glucose 6-phosphate dehydrogenase activity restores redox balance in vascular endothelial cells  
558 exposed to high glucose. *PLoS one* **7**: e49128
- 559 22. Xu Y, Zhang Z, Hu J, Stillman IE, Leopold JA, Handy DE, Loscalzo J, Stanton RC (2010) Glucose-6-phosphate  
560 dehydrogenase-deficient mice have increased renal oxidative stress and increased albuminuria. *FASEB J* **24**:  
561 609-16
- 562 23. Jiang XS, Chen XM, Wan JM, Gui HB, Ruan XZ, Du XG (2017) Autophagy Protects against Palmitic  
563 Acid-Induced Apoptosis in Podocytes in vitro. *Scientific reports* **7**: 42764
- 564 24. Sun J, Li ZP, Zhang RQ, Zhang HM (2017) Repression of miR-217 protects against high glucose-induced  
565 podocyte injury and insulin resistance by restoring PTEN-mediated autophagy pathway. *Biochemical and*  
566 *biophysical research communications* **483**: 318-324
- 567 25. Li C, Siragy HM (2014) High glucose induces podocyte injury via enhanced (pro)renin  
568 receptor-Wnt-beta-catenin-snail signaling pathway. *PLoS one* **9**: e89233
- 569 26. Pretsch W, Charles DJ, Merkle S (1988) X-linked glucose-6-phosphate dehydrogenase deficiency in *Mus*  
570 *musculus*. *Biochemical genetics* **26**: 89-103
- 571 27. Thilo F, Lee M, Xia S, Zakrzewicz A, Tepel M (2014) High glucose modifies transient receptor potential  
572 canonical type 6 channels via increased oxidative stress and syndecan-4 in human podocytes. *Biochemical and*  
573 *biophysical research communications* **450**: 312-7
- 574 28. Siddiqi FS, Majumder S, Thai K, Abdalla M, Hu P, Advani SL, White KE, Bowskill BB, Guarna G, Dos Santos  
575 CC, *et al.* (2016) The Histone Methyltransferase Enzyme Enhancer of Zeste Homolog 2 Protects against  
576 Podocyte Oxidative Stress and Renal Injury in Diabetes. *Journal of the American Society of Nephrology : JASN*  
577 **27**: 2021-34
- 578 29. Fields S, Song O (1989) A novel genetic system to detect protein-protein interactions. *Nature* **340**: 245-6
- 579 30. Kim W, Bennett EJ, Huttlin EL, Guo A, Li J, Possemato A, Sowa ME, Rad R, Rush J, Comb MJ, *et al.* (2011)  
580 Systematic and quantitative assessment of the ubiquitin-modified proteome. *Molecular cell* **44**: 325-40
- 581 31. Lin JS, Susztak K (2016) Podocytes: the Weakest Link in Diabetic Kidney Disease? *Current diabetes reports*  
582 **16**: 45
- 583 32. Yoshimoto K, Nakamura T, Ichihara A (1983) Reciprocal effects of epidermal growth factor on key lipogenic  
584 enzymes in primary cultures of adult rat hepatocytes. Induction of glucose-6-phosphate dehydrogenase and  
585 suppression of malic enzyme and lipogenesis. *The Journal of biological chemistry* **258**: 12355-60
- 586 33. Tian WN, Braunstein LD, Pang J, Stuhlmeier KM, Xi QC, Tian X, Stanton RC (1998) Importance of  
587 glucose-6-phosphate dehydrogenase activity for cell growth. *J Biol Chem* **273**: 10609-17

- 588 34. Kuo WY, Tang TK (1998) Effects of G6PD overexpression in NIH3T3 cells treated with tert-butyl  
589 hydroperoxide or paraquat. *Free radical biology & medicine* **24**: 1130-8
- 590 35. Xu J, Li Z, Xu P, Yang Z (2012) Protective effects of leukemia inhibitory factor against oxidative stress during  
591 high glucose-induced apoptosis in podocytes. *Cell stress & chaperones* **17**: 485-93
- 592 36. Chen J, Chen JK, Harris RC (2015) EGF receptor deletion in podocytes attenuates diabetic nephropathy.  
593 *Journal of the American Society of Nephrology : JASN* **26**: 1115-25
- 594 37. Park J, Rho HK, Kim KH, Choe SS, Lee YS, Kim JB (2005) Overexpression of glucose-6-phosphate  
595 dehydrogenase is associated with lipid dysregulation and insulin resistance in obesity. *Mol Cell Biol* **25**: 5146-57
- 596 38. Park J, Choe SS, Choi AH, Kim KH, Yoon MJ, Suganami T, Ogawa Y, Kim JB (2006) Increase in  
597 glucose-6-phosphate dehydrogenase in adipocytes stimulates oxidative stress and inflammatory signals.  
598 *Diabetes* **55**: 2939-49
- 599 39. Lee JW, Choi AH, Ham M, Kim JW, Choe SS, Park J, Lee GY, Yoon KH, Kim JB (2011) G6PD up-regulation  
600 promotes pancreatic beta-cell dysfunction. *Endocrinology* **152**: 793-803
- 601 40. Gupte RS, Floyd BC, Kozicky M, George S, Ungvari ZI, Neito V, Wolin MS, Gupte SA (2009) Synergistic  
602 activation of glucose-6-phosphate dehydrogenase and NAD(P)H oxidase by Src kinase elevates superoxide in  
603 type 2 diabetic, Zucker fa/fa, rat liver. *Free radical biology & medicine* **47**: 219-28
- 604 41. Rao X, Duan X, Mao W, Li X, Li Z, Li Q, Zheng Z, Xu H, Chen M, Wang PG, *et al.* (2015) O-GlcNAcylation of  
605 G6PD promotes the pentose phosphate pathway and tumor growth. *Nature communications* **6**: 8468
- 606 42. Zhou L, Wang F, Sun R, Chen X, Zhang M, Xu Q, Wang Y, Wang S, Xiong Y, Guan KL, *et al.* (2016) SIRT5  
607 promotes IDH2 desuccinylation and G6PD deglutarylation to enhance cellular antioxidant defense. *EMBO*  
608 *reports* **17**: 811-22
- 609 43. Udeshi ND, Svinkina T, Mertins P, Kuhn E, Mani DR, Qiao JW, Carr SA (2013) Refined preparation and use of  
610 anti-diglycine remnant (K-epsilon-GG) antibody enables routine quantification of 10,000s of ubiquitination sites  
611 in single proteomics experiments. *Molecular & cellular proteomics : MCP* **12**: 825-31
- 612 44. Latif F, Tory K, Gnarr J, Yao M, Duh FM, Orcutt ML, Stackhouse T, Kuzmin I, Modi W, Geil L, *et al.* (1993)  
613 Identification of the von Hippel-Lindau disease tumor suppressor gene. *Science* **260**: 1317-20
- 614 45. Lonser RR, Glenn GM, Walther M, Chew EY, Libutti SK, Linehan WM, Oldfield EH (2003) von Hippel-Lindau  
615 disease. *Lancet* **361**: 2059-67
- 616 46. Damjanovic SS, Ilic BB, Beleslin Cokic BB, Antic JA, Bankovic JZ, Milicevic IT, Rodic GS, Ilic DS, Todorovic VN,  
617 Puskas N, *et al.* (2016) Tuberous sclerosis complex protein 1 expression is affected by VHL Gene alterations and  
618 HIF-1alpha production in sporadic clear-cell renal cell carcinoma. *Experimental and molecular pathology* **101**:  
619 323-331
- 620 47. Scarpa A, Chang DK, Nones K, Corbo V, Patch AM, Bailey P, Lawlor RT, Johns AL, Miller DK, Mafficini A, *et al.*  
621 (2017) Whole-genome landscape of pancreatic neuroendocrine tumours. *Nature*
- 622 48. Zehetner J, Danzer C, Collins S, Eckhardt K, Gerber PA, Ballschmieter P, Galvanovskis J, Shimomura K,  
623 Ashcroft FM, Thorens B, *et al.* (2008) PVHL is a regulator of glucose metabolism and insulin secretion in  
624 pancreatic beta cells. *Genes & development* **22**: 3135-46
- 625 49. Cantley J, Selman C, Shukla D, Abramov AY, Forstreuter F, Esteban MA, Claret M, Lingard SJ, Clements M,  
626 Harten SK, *et al.* (2009) Deletion of the von Hippel-Lindau gene in pancreatic beta cells impairs glucose  
627 homeostasis in mice. *The Journal of clinical investigation* **119**: 125-35
- 628 50. Puri S, Cano DA, Hebrok M (2009) A role for von Hippel-Lindau protein in pancreatic beta-cell function.  
629 *Diabetes* **58**: 433-41

- 630 51. Ding M, Coward RJ, Jeansson M, Kim W, Quaggin SE (2013) Regulation of hypoxia-inducible factor 2-a is  
631 essential for integrity of the glomerular barrier. *American journal of physiology Renal physiology* **304**: F120-6  
632 52. Arias-Gonzalez L, Moreno-Gimeno I, del Campo AR, Serrano-Oviedo L, Valero ML, Esparis-Ogando A, de la  
633 Cruz-Morcillo MA, Melgar-Rojas P, Garcia-Cano J, Cimas FJ, *et al.* (2013) ERK5/BMK1 is a novel target of the  
634 tumor suppressor VHL: implication in clear cell renal carcinoma. *Neoplasia* **15**: 649-59  
635 53. Anderson K, Nordquist KA, Gao X, Hicks KC, Zhai B, Gygi SP, Patel TB (2011) Regulation of cellular levels of  
636 Sprouty2 protein by prolyl hydroxylase domain and von Hippel-Lindau proteins. *The Journal of biological*  
637 *chemistry* **286**: 42027-36  
638 54. Xie L, Xiao K, Whalen EJ, Forrester MT, Freeman RS, Fong G, Gygi SP, Lefkowitz RJ, Stamler JS (2009)  
639 Oxygen-regulated beta(2)-adrenergic receptor hydroxylation by EGLN3 and ubiquitylation by pVHL. *Science*  
640 *signaling* **2**: ra33  
641 55. Cummins EP, Berra E, Comerford KM, Ginouves A, Fitzgerald KT, Seeballuck F, Godson C, Nielsen JE,  
642 Moynagh P, Pouyssegur J, *et al.* (2006) Prolyl hydroxylase-1 negatively regulates I $\kappa$ B kinase-beta, giving  
643 insight into hypoxia-induced NF $\kappa$ B activity. *Proceedings of the National Academy of Sciences of the United*  
644 *States of America* **103**: 18154-9  
645 56. Chen J, Liu F, Li H, Archacki S, Gao M, Liu Y, Liao S, Huang M, Wang J, Yu S, *et al.* (2015) pVHL interacts with  
646 Ceramide kinase like (CERKL) protein and ubiquitinates it for oxygen dependent proteasomal degradation.  
647 *Cellular signalling* **27**: 2314-23  
648 57. Sanders S, Smith DP, Thomas GA, Williams ED (1997) A glucose-6-phosphate dehydrogenase (G6PD) splice  
649 site consensus sequence mutation associated with G6PD enzyme deficiency. *Mutation research* **374**: 79-87  
650 58. Leopold JA, Walker J, Scribner AW, Voetsch B, Zhang YY, Loscalzo AJ, Stanton RC, Loscalzo J (2003)  
651 Glucose-6-phosphate dehydrogenase modulates vascular endothelial growth factor-mediated angiogenesis.  
652 *The Journal of biological chemistry* **278**: 32100-6  
653 59. Gurley SB, Mach CL, Stegbauer J, Yang J, Snow KP, Hu A, Meyer TW, Coffman TM (2010) Influence of  
654 genetic background on albuminuria and kidney injury in Ins2(+/*C96Y*) (Akita) mice. *American journal of*  
655 *physiology Renal physiology* **298**: F788-95  
656 60. Mima A, Kitada M, Geraldine P, Li Q, Matsumoto M, Mizutani K, Qi W, Li C, Leitges M, Rask-Madsen C, *et al.*  
657 (2012) Glomerular VEGF resistance induced by PKC $\delta$ /SHP-1 activation and contribution to diabetic  
658 nephropathy. *FASEB journal : official publication of the Federation of American Societies for Experimental*  
659 *Biology* **26**: 2963-74  
660 61. Liu W, Yang Y, Liu Y, Lu X, Guo S, Wu M, Wang M, Yan L, Wang Q, Zhao X, *et al.* (2016) Exogenous kallikrein  
661 protects against diabetic nephropathy. *Kidney Int* **90**: 1023-1036  
662 62. Hartner A, Cordasic N, Klanke B, Menendez-Castro C, Veelken R, Schmieder RE, Hilgers KF (2014) Renal  
663 protection by low dose irbesartan in diabetic nephropathy is paralleled by a reduction of inflammation, not of  
664 endoplasmic reticulum stress. *Biochimica et biophysica acta* **1842**: 558-65  
665 63. Liu Z, Chen P, Gao H, Gu Y, Yang J, Peng H, Xu X, Wang H, Yang M, Liu X, *et al.* (2014) Ubiquitylation of  
666 autophagy receptor Optineurin by HACE1 activates selective autophagy for tumor suppression. *Cancer Cell* **26**:  
667 106-20

668

669

670 **Figure Legends:**

671 **Figure 1. G6PD protein expression and activity were decreased in diabetic kidney.**

672 A G6PD protein expression was significantly decreased in diabetic kidney. The renal cortex from  
673 non-diabetic subjects (n=3) and diabetic patients (n=3) were examined by IHC staining for G6PD.

674 Shown are average values with standard deviation (s.d.). \*\*\*\* denotes  $P < 0.0001$  for DM versus NDM.

675 B, C, D G6PD protein level was decreased in different diabetic rodents, including STZ diabetic rats

676 (B), STZ diabetic mice (C) and Akita mice (D). The renal cortex from non-diabetic (NDM) controls

677 and diabetic rodents (DM) were collected and Western blot was performed to examine the expression

678 of G6PD protein. Shown are average values with standard deviation (s.d.). n=5 mice for each group. \*

679 denotes  $P < 0.05$  for DM versus NDM.

680 E G6PD activity was decreased in the diabetic kidney. The renal cortex from non-diabetic (NDM)

681 controls and STZ-induced diabetic mice (DM) were collected and G6PD activity was determined.

682 Shown are average values with standard deviation (s.d.). n=5 mice for each group. \* denotes  $P < 0.05$

683 for DM versus NDM.

684

685 **Figure 2. G6PD expression was decreased in podocytes of diabetic kidney.**

686 A Podocyte number was decreased in diabetic kidney. The renal cortex from non-diabetic (NDM)

687 controls and diabetic rodents (DM) were examined with immunofluorescence using anti-WT-1

688 antibody to label podocyte cells (green staining). The nuclei were counterstained with

689 4',6-diamidino-2-phenylindole (DAPI, blue staining). n=4 mice for each group. Magnification 40×

690 B G6PD protein level was decreased in podocytes of diabetic kidney. The renal cortex from  
691 non-diabetic (NDM) controls and diabetic rodents (DM) were examined with co-immunofluorescence  
692 using anti-WT-1 antibody (green staining) and anti-G6PD antibody (red staining). DAPI was used to  
693 label the nuclei (blue staining). Colocalization of the fluorochromes yielded a yellow color (see  
694 arrows). n=4 mice for each group. Magnification 40×.

695

696 **Figure 3. High glucose and palmitate decreased G6PD protein expression and increased**  
697 **apoptosis of podocyte.**

698 A High glucose decreased G6PD protein level and increased podocytes apoptosis. Podocytes were  
699 treated with normal glucose (NG, 5.6mM glucose), high glucose (HG, 25mM glucose), or normal  
700 glucose supplemented with 19.4mM mannitol (NG+M) for 72 hours. Mannitol (M) was added as an  
701 osmotic control. The protein levels of G6PD and cleaved caspase-3 were determined by Western blot.  
702 Shown are average values with standard deviation (s.d.) of triplicated experiments. \* denotes  $P < 0.05$   
703 for cells treated with HG versus cells with NG or NG + M.

704 B Palmitate decreased the expression of G6PD protein and increased the apoptosis of podocyte.  
705 Podocytes were treated with bovine serum albumin (BSA), 125 $\mu$ M palmitate (PA125), 250 $\mu$ M  
706 palmitate (PA250) or 500 $\mu$ M palmitate (PA500) for 24 hours. Protein levels of G6PD and cleaved  
707 caspase-3 were determined by Western blot. Shown are average values with standard deviation (s.d.)  
708 of triplicated experiments. \* denotes  $P < 0.05$  for cells treated with PA250 versus cells with BSA and  
709 \*\* denotes  $P < 0.01$  for cells treated with PA500 versus cells with BSA.

710

711 **Figure 4. Inhibition of G6PD increased apoptosis and loss of podocytes both in vitro and in vivo.**

712 A siRNA targeting to G6PD (siG6PD) significantly inhibited G6PD protein level. Podocytes were  
713 transfected with either siG6PD or scrambled siRNA for 48 hours and then G6PD protein expression  
714 was determined by Western blot. Shown are average values with standard deviation (s.d.) of  
715 triplicated experiments. \* denotes  $P < 0.05$  for cells transfected with siG6PD versus cells with  
716 scramble.

717 B Inhibition of G6PD led to the increased apoptosis of podocyte. Podocytes were transfected with  
718 either scrambled siRNA (scramble) or siG6PD and flow cytometry was used to detect podocytes  
719 apoptosis. Shown are average values with standard deviation (s.d.) of triplicated experiments. \*  
720 denotes  $P < 0.05$  for cells transfected with siG6PD versus cells with scramble.

721 C Deficiency of G6PD caused podocytes loss. The renal cortex from Hemi G6PD deficient mice aged  
722 9wk, 23wk and 39wk and age-matched littermate wild type mice were examined with IHC staining  
723 for WT-1. n=6 mice for each group. Magnification 40 $\times$ . \*\* denotes  $P < 0.01$  and \*\*\* denotes  $P < 0.001$   
724 for Hemi G6PD deficient mice versus wild type mice. ### denotes  $P < 0.001$  for 9wk Hemi G6PD  
725 deficient mice versus 39wk Hemi G6PD deficient mice.

726 D Deficiency of G6PD caused increased podocyte apoptosis in vivo. The renal cortex from  
727 Hemizygous (Hemi) G6PD deficient mice (right panel) and age-matched littermate wild type mice  
728 (left panel) were examined with co-immunofluorescence using anti-WT-1 antibody to label podocyte  
729 cells (red staining) and TUNEL assay to label apoptotic cells (green staining). The nuclei were  
730 counterstained with DAPI (blue staining). Colocalization of the fluorochromes results in a yellow  
731 color (see arrows). n=6 mice for each group. Magnification 40 $\times$ .

732

733 **Figure 5. Elevation of G6PD expression decreased the apoptosis of podocyte.**

734 A Overexpressing G6PD ameliorated podocytes apoptosis caused by high glucose. Podocytes were  
735 treated with normal glucose (NG, 5.6mM glucose), high glucose (HG, 25mM glucose), high glucose  
736 with infection of adenoviruses G6PD (HG+Ad-G6PD) and high glucose with infection of empty  
737 vector adenoviruses (HG+Ad-null). The levels of protein were determined by Western blot. Shown  
738 are average values with standard deviation (s.d.) of triplicated experiments. \* denotes  $P < 0.05$  for  
739 cells treated with HG versus cells with NG. # denotes  $P < 0.05$  for cells treated with HG+Ad-G6PD  
740 versus cells with HG+Ad-null.

741 B Elevation of G6PD rescued the apoptosis of podocyte induced by palmitate. Podocytes were treated  
742 with bovine serum albumin (BSA), 500 $\mu$ M palmitate (PA500), 500 $\mu$ M palmitate with infection of  
743 adenoviruses G6PD (PA500+Ad-G6PD) and 500 $\mu$ M palmitate with infection of empty vector  
744 adenoviruses (PA500+Ad-null). Protein expression were determined by Western blot. Shown are  
745 average values with standard deviation (s.d.) of triplicated experiments. \* denotes  $P < 0.05$  for cells  
746 treated with PA500 versus cells with BSA. # denotes  $P < 0.05$  for cells treated with PA500+Ad-G6PD  
747 versus cells with PA500+Ad-null.

748

749 **Figure 6. Elevation of G6PD protein expression reversed the redox imbalance caused by high**  
750 **glucose.**

751 A Overexpressing G6PD increased NADPH level in podocytes exposed to high glucose. Podocytes  
752 were treated with normal glucose (NG, 5.6mM glucose), high glucose (HG, 25mM glucose), high



753 glucose with infection of adenoviruses G6PD (HG+Ad-G6PD) and high glucose with infection of  
754 empty vector adenoviruses (HG+Ad-null). NADPH was measured by a colorimetric method  
755 according to the manufacturer's instructions. Shown are average values with standard deviation (s.d.)  
756 of triplicated experiments. \*\* denotes  $P < 0.01$  for cells treated with HG versus cells with NG. #  
757 denotes  $P < 0.05$  for cells treated with HG+Ad-G6PD versus cells with HG+Ad-null.

758 B the decreased GSH/GSSG in podocytes exposed to high glucose was ameliorated by overexpressing  
759 G6PD. Podocytes were treated as described in (A) and GSH/GSSG was measured by a  
760 spectrophotometric method following the manufacturer's instructions. Shown are average values with  
761 standard deviation (s.d.) of triplicated experiments. \*\* denotes  $P < 0.01$  for cells treated with HG  
762 versus cells with NG. ### denotes  $P < 0.01$  for cells treated with HG+Ad-G6PD versus cells with  
763 HG+Ad-null.

764 C Elevation of G6PD protein expression reduced the accumulation of ROS in podocytes exposed to  
765 high glucose. Podocytes were treated as described in Figure 6A. ROS accumulation was measured  
766 with the cell-permeable, oxidation-sensitive dye CM-H<sub>2</sub>DCFDA. Shown are average values with  
767 standard deviation (s.d.) of triplicated experiments. \* denotes  $P < 0.05$  for cells treated with HG versus  
768 cells with NG. ### denotes  $P < 0.01$  for cells treated with HG+Ad-G6PD versus cells with HG+Ad-null.

769

770 **Figure 7. High glucose promoted G6PD protein degradation through the ubiquitin proteasome**  
771 **pathway.**

772 A Palmitate decreased the level of G6PD mRNA. Podocytes were treated with BSA, 500 $\mu$ M palmitate  
773 (PA500) for 24 hours. G6PD mRNA level was measured by real-time PCR. Shown are average values

774 with standard deviation (s.d.) of triplicated experiments. \* denotes  $P < 0.05$  for cells treated with  
775 PA500 versus cells with BSA.

776 B High glucose had no effect on G6PD mRNA level. Podocytes were treated with normal glucose  
777 (NG, 5.6mM glucose), high glucose (HG, 25mM glucose), or normal glucose supplemented with  
778 mannitol (NG+M) for 72 hours. Real-time PCR was used to analyze G6PD mRNA abundance. Shown  
779 are average values with standard deviation (s.d.) of triplicated experiments.

780 C The degradation of G6PD induced by high glucose was in a time-dependent manner. Podocytes  
781 were incubated with high glucose (HG, 25mM glucose) for the indicated time, and cell lysates were  
782 subjected to G6PD and  $\beta$ -actin immunoblotting. Shown are average values with standard deviation  
783 (s.d.) of triplicated experiments. \* denotes  $P < 0.05$  for cells treated with HG for 72 hours versus cells  
784 incubated in normal glucose.

785 D The decreased G6PD protein level in high glucose was largely rescued by MG132. Podocytes were  
786 cultured with normal glucose (NG, 5.6mM glucose), normal glucose supplemented with 0.5 $\mu$ M  
787 MG132 (NG+MG132), high glucose (HG, 25mM glucose) or high glucose supplemented with 0.5 $\mu$ M  
788 MG132 (HG+MG132). Shown are average values with standard deviation (s.d.) of triplicated  
789 experiments. \* denotes  $P < 0.05$  for cells treated with HG versus cells with HG+MG132.

790 E G6PD was ubiquitylated. HEK293T cells were transfected with indicated plasmids with or without  
791 20 $\mu$ M MG132 for 12 hours. Cell lysates were subjected to immunoprecipitation (IP) with anti-Flag  
792 M2 beads. The precipitates were probed using His and Flag antibodies. Input cell lysates were  
793 subjected to Flag and GAPDH immunoblotting.

794

795 **Figure 8. VHL ubiquitylated and degraded G6PD.**

796 A Human G6PD interacted with the E3 ubiquitin ligase VHL in Y2H system. Using human G6PD as  
797 bait, VHL was identified as an interacting protein with G6PD in yeast. G6PD and VHL were  
798 co-transformed into yeast strain Mav203-activated expression of  $\beta$ -galactosidase. AD, Activation  
799 Domain; BD, Binding Domain; SD-2, deficient in Leucine and Tryptophan; SD-4, deficient in  
800 Leucine, Tryptophan, Histidine, and Uracil.

801 B G6PD interacted with VHL. Co-immunoprecipitation assay shown that tagged G6PD and VHL  
802 formed a complex in HEK293T cells. HEK293T cells were transfected with HA-VHL expression  
803 plasmid in combination with or without Flag-G6PD expression plasmid. Flag-G6PD was  
804 immunoprecipitated with anti-Flag M2 beads. The precipitates were probed using HA and Flag  
805 antibodies.

806 C VHL negatively regulated the expression of G6PD protein. HEK293T cells were co-transfected  
807 with Flag-G6PD expression plasmid and increasing amounts of HA-VHL expression plasmid. The  
808 levels of Flag and HA were determined by Western blot with indicated antibodies.

809 D VHL reduced G6PD protein stability. HEK293T cells were transfected with Flag-G6PD expression  
810 plasmid with or without HA-VHL expression plasmid. After 36 hours, cells were treated with CHX  
811 (100 $\mu$ g/ml) for the indicated time. Cell lysates were subjected to Flag, GAPDH and HA  
812 immunoblotting. Shown are average values with standard deviation (s.d.) of triplicated experiments. \*

813 denotes  $P < 0.05$  for cells co-transfected with Flag-G6PD and HA-VHL (Flag-G6PD + HA-VHL)  
814 versus cells transfected with Flag-G6PD.

815 E G6PD was efficiently ubiquitylated in the presence of VHL. HEK293T cells were transfected with  
816 different combinations of plasmids as indicated. G6PD was immunoprecipitated with anti-Flag M2  
817 beads and immunoblotted with anti-His antibody to detect ubiquitylated G6PD.

818 F Knockdown of endogenous VHL enhanced G6PD protein abundance. HEK293T cells were  
819 transfected with scrambled siRNA (scramble), siVHL#1 and siVHL#2. The levels of endogenous  
820 G6PD and VHL were analyzed by Western blot with indicated antibodies. Shown are average values  
821 with standard deviation (s.d.) of triplicated experiments. \* denotes  $P < 0.05$  for cells treated with  
822 siVHL#2 versus cells with scramble.

823

824 **Figure 9. K<sup>366</sup> and K<sup>403</sup> in G6PD were the major sites for VHL-mediated ubiquitylation.**

825 A The map of the 5 lysine sites for VHL mediated ubiquitylation on G6PD. HEK293T cells were  
826 transfected with Flag-G6PD, His-Ub and HA-VHL plasmids, and then ubiquitylated G6PD were  
827 immunoprecipitated with anti-Flag M2 beads. MS spectra analysis identified 5 Lys residues (K<sup>97</sup>, K<sup>366</sup>,  
828 K<sup>403</sup>, K<sup>407</sup> and K<sup>408</sup>) for VHL-mediated ubiquitylation in G6PD.

829 B K<sup>366</sup> and K<sup>403</sup> were the major sites for VHL-mediated ubiquitylation on G6PD. HEK293T cells were  
830 transfected with Flag-tagged wild-type G6PD (WT) or its mutants bearing single Lys-to-Arg  
831 substitutions at the above 5 potential ubiquitylation sites. Cell lysates were subjected to  
832 immunoprecipitation (IP) with anti-Flag M2 beads. The precipitates were probed using His and Flag  
833 antibodies.

834 C Mutants with both K<sup>366</sup> and K<sup>403</sup> sites (K<sup>366+403R</sup>) largely abolished the ubiquitylation of G6PD.

835 HEK293T cells were transfected with Flag-tagged wild-type G6PD (WT) or G6PD mutants bearing

836 single or two Lys-to-Arg substitutions at K<sup>366</sup> and K<sup>403</sup> sites.

837

838

839

840

841

842

843

844

845

846

847

848

849

850

851

852

853

854

855 **Expanded View Figure legends:**

856 **Figure EV1. Blood glucose was increased in diabetic rodents.**

857 A, B, C Blood glucose was increased in STZ-induced diabetic rats, STZ-induced diabetic mice and  
858 Akita mice, respectively. n=6 mice for each group. \* denotes  $P < 0.05$  for DM versus NDM.

859

860 **Figure EV2. Verification of Flag-G6PD, His-Ub and HA-VHL plasmids.**

861 A Flag-G6PD plasmid was expressed in HEK293T cells. Flag-G6PD plasmid was transfected into  
862 HEK293T cells for 48 hours. Cells lysates were subjected to Flag and GAPDH immunoblotting.

863 B His-Ub plasmid was verified in HEK293T cells. HEK293T cells were transfected with His-Ub  
864 plasmid for 48 hours. Protein level of His was analyzed by Western blot with anti-His antibody.

865 C HA-VHL plasmid was expressed in HEK293T. HEK293T cells were transfected with HA-VHL  
866 plasmid for 48 hours and cells lysates were subjected to HA and GAPDH immunoblotting.

**Figure 1. G6PD protein expression and activity were decreased in diabetic kidney.**

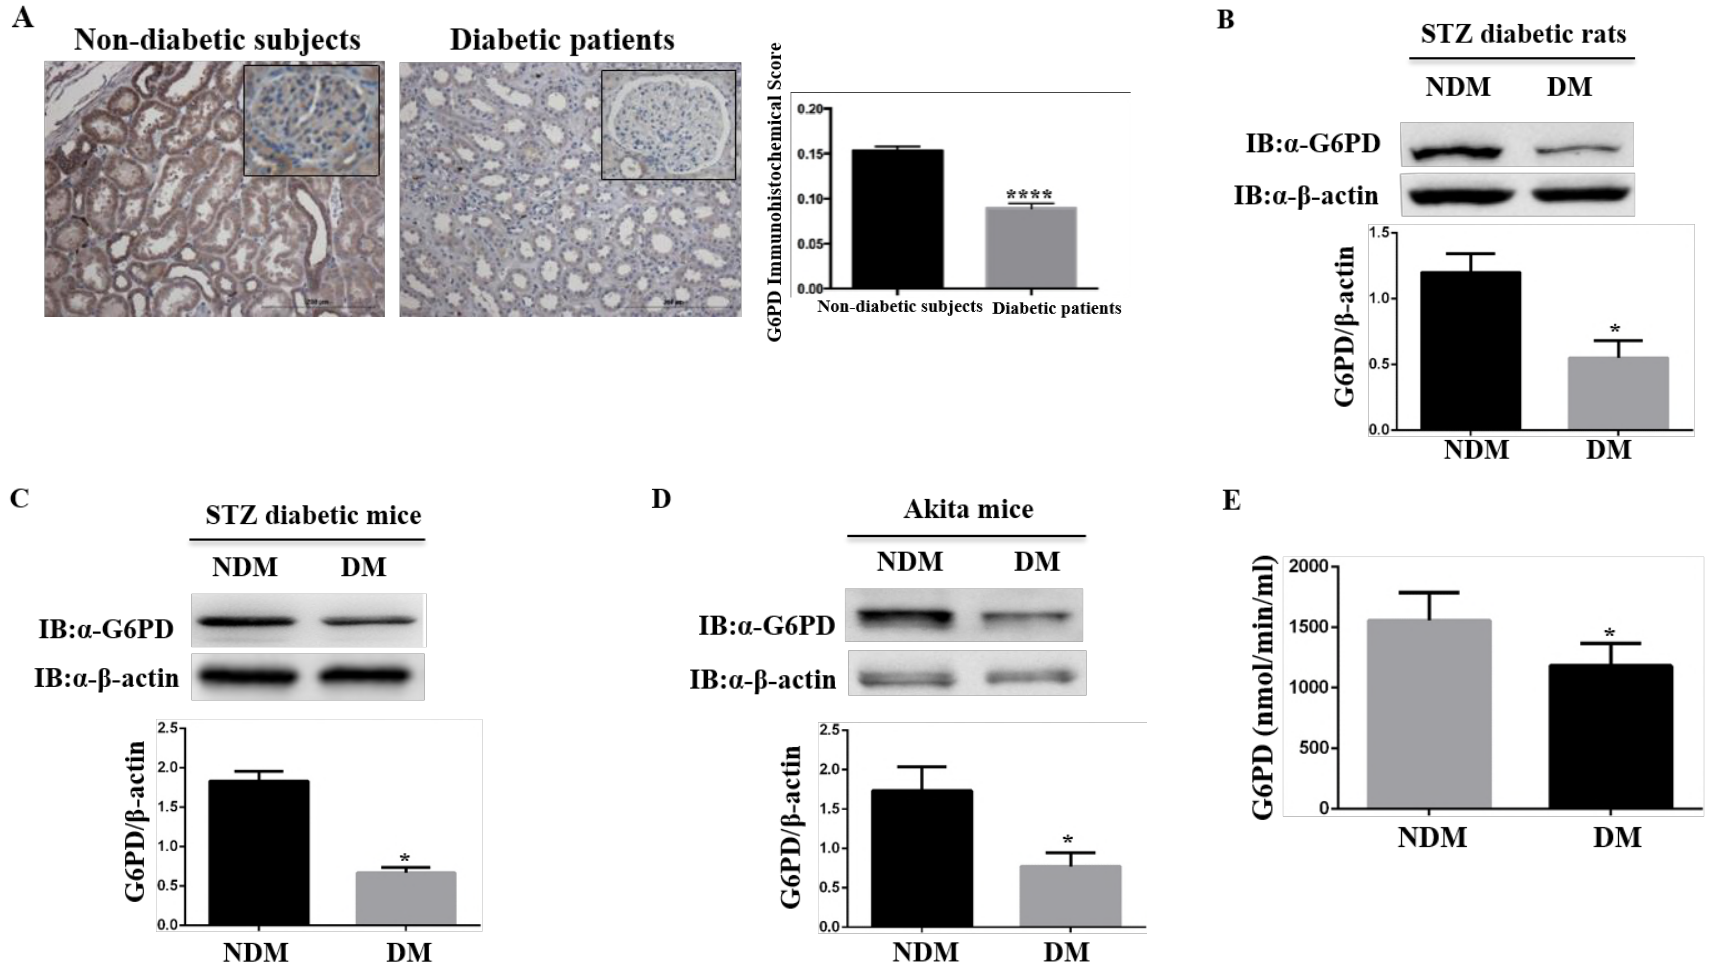

**Figure 2. G6PD expression was decreased in podocytes of diabetic kidney.**

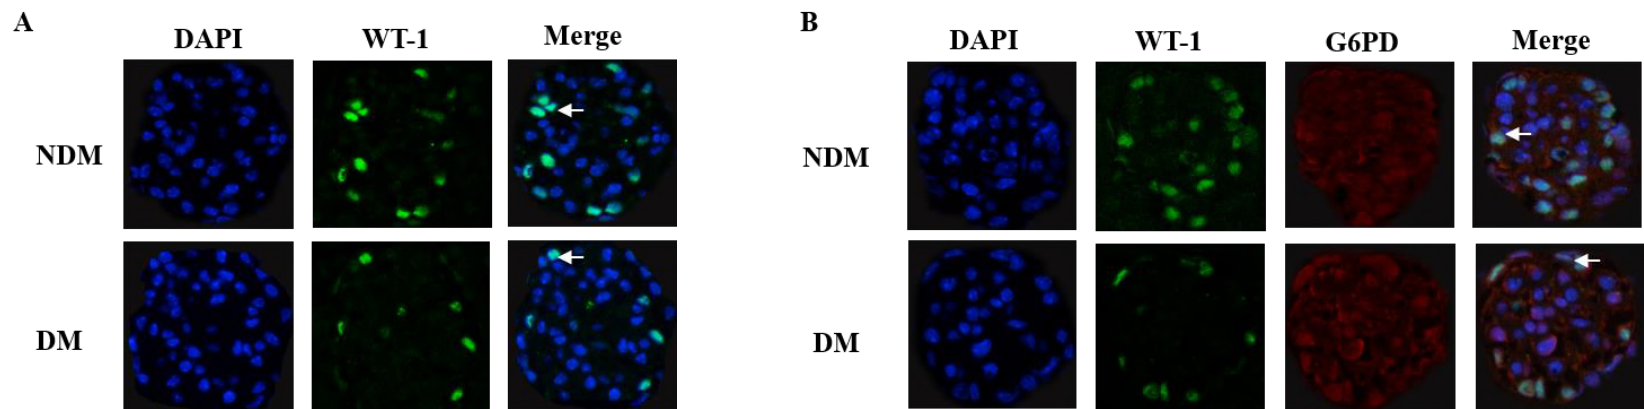



**Figure 3. High glucose and palmitate decreased G6PD protein expression and increased apoptosis of podocyte.**

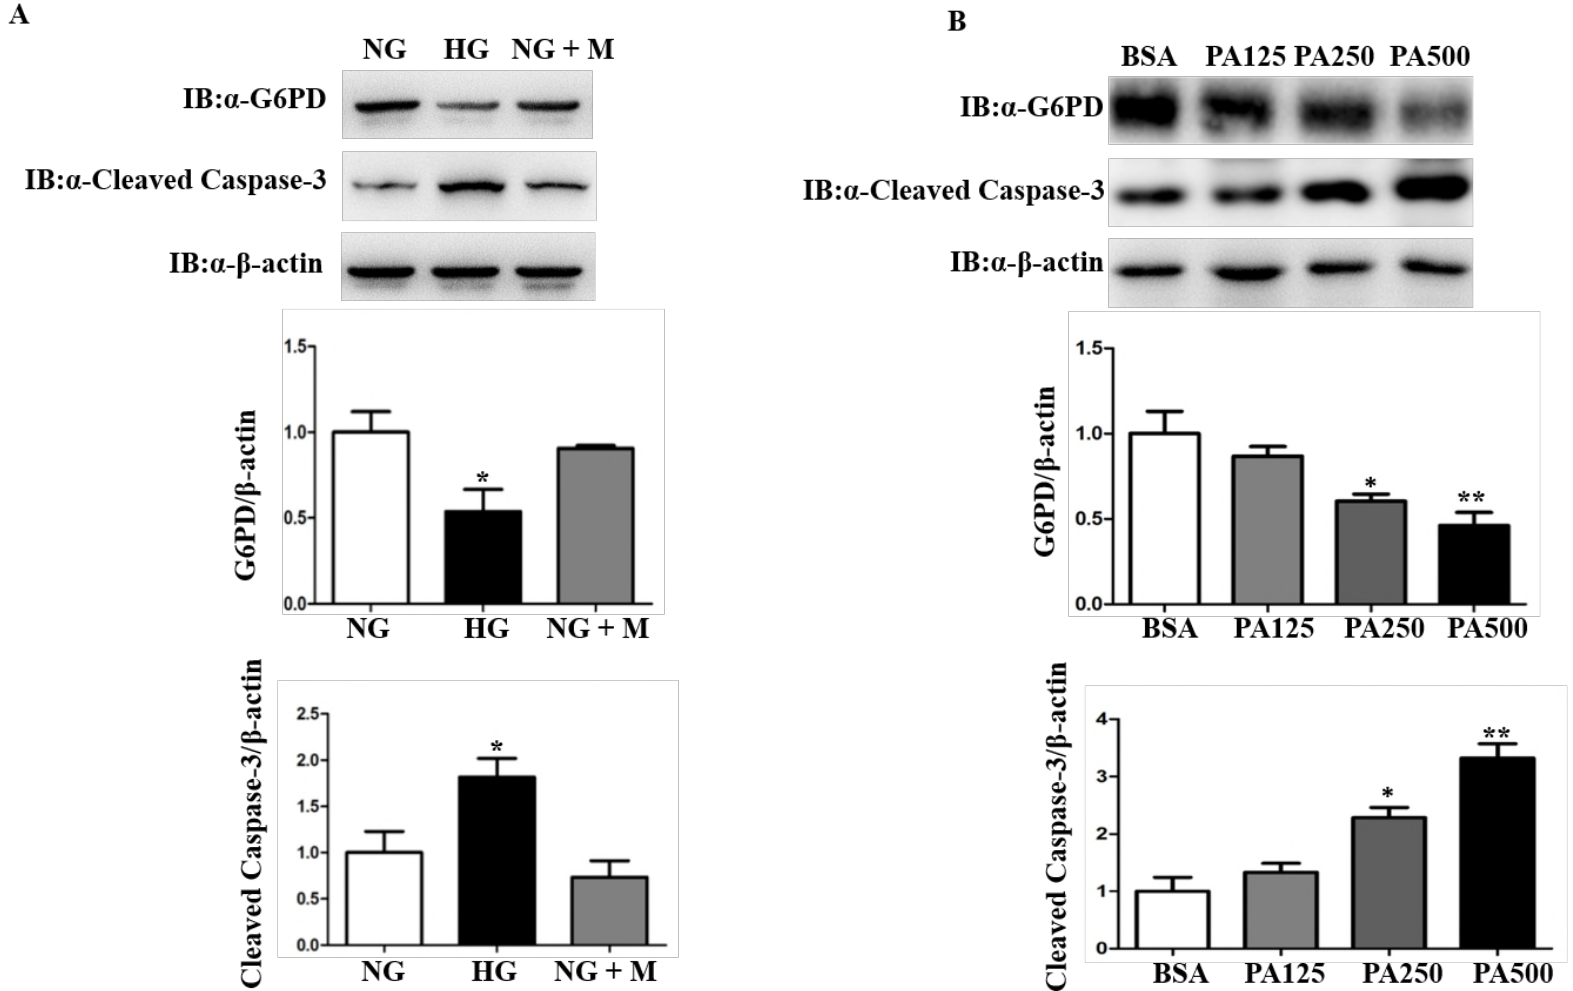

**Figure 4. Inhibition of G6PD increased apoptosis and loss of podocytes both in vitro and in vivo.**

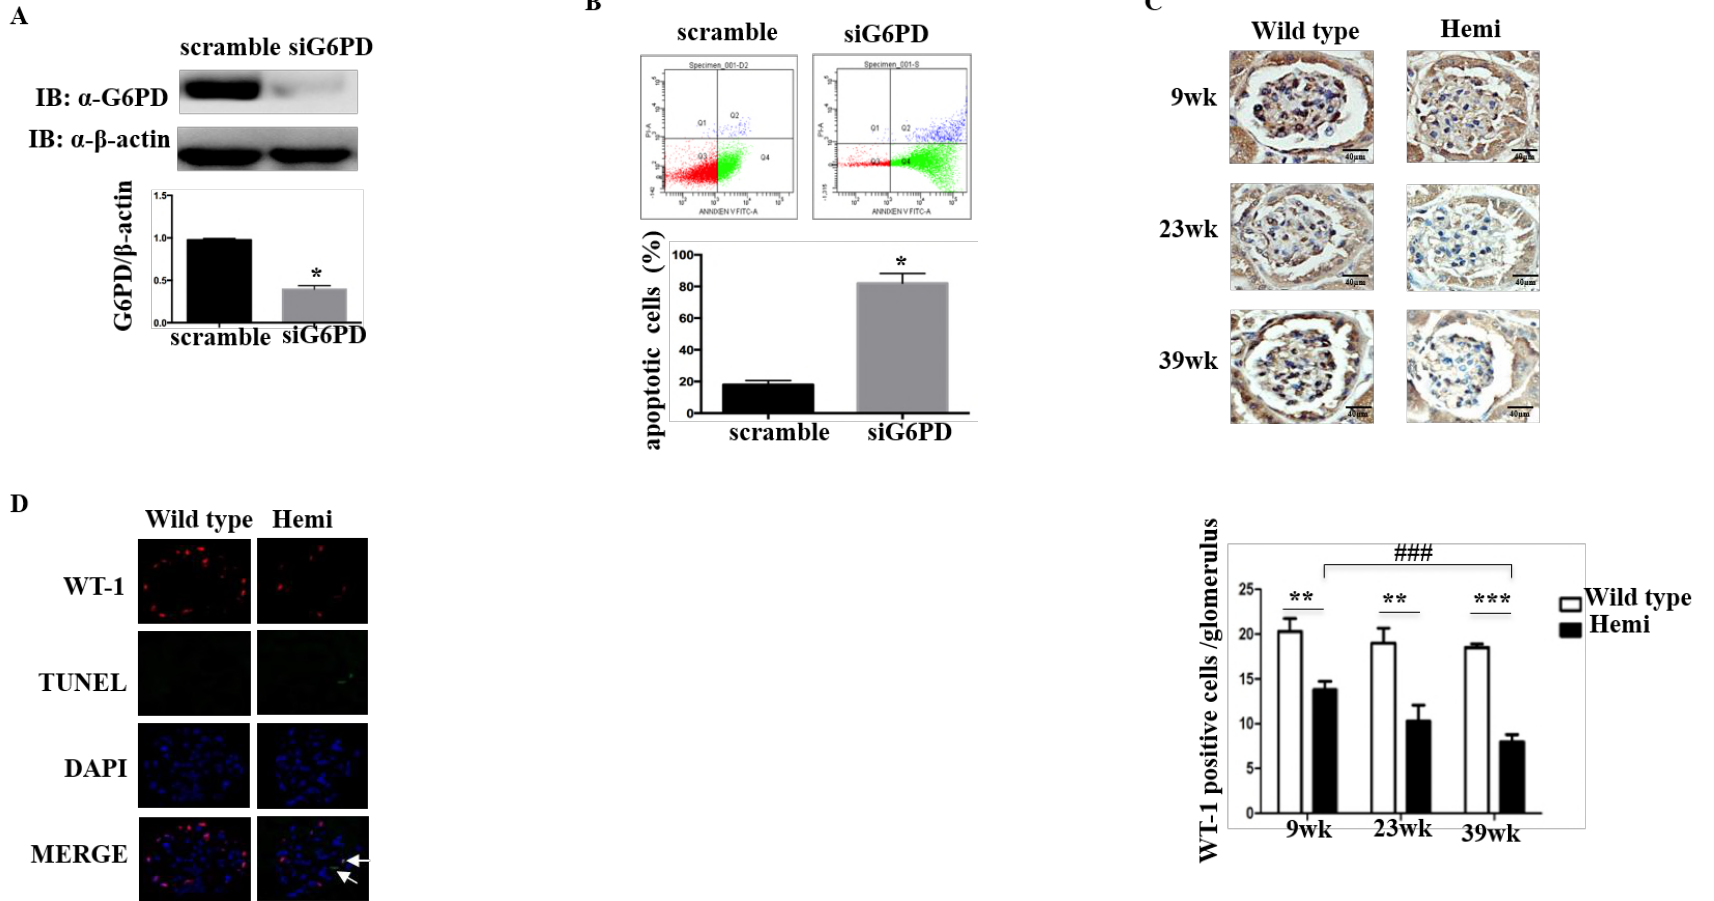

**Figure 5. Elevation of G6PD expression decreased the apoptosis of podocyte.**

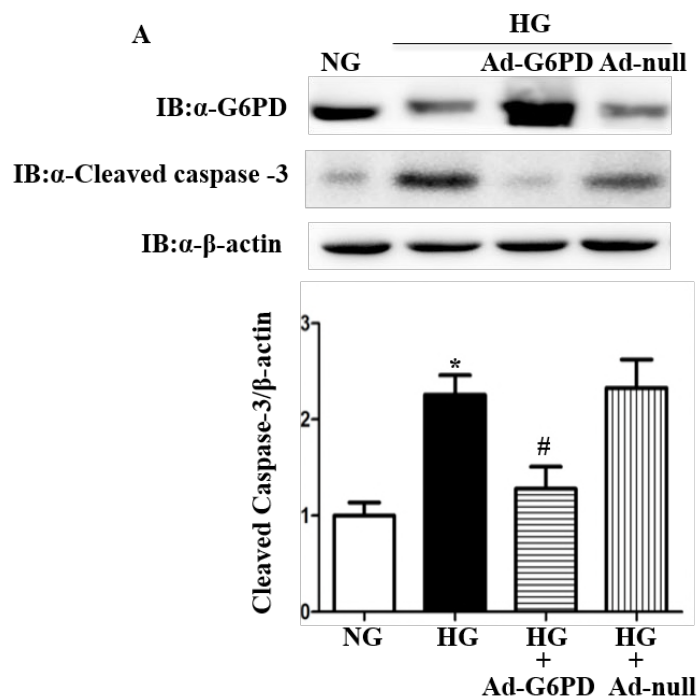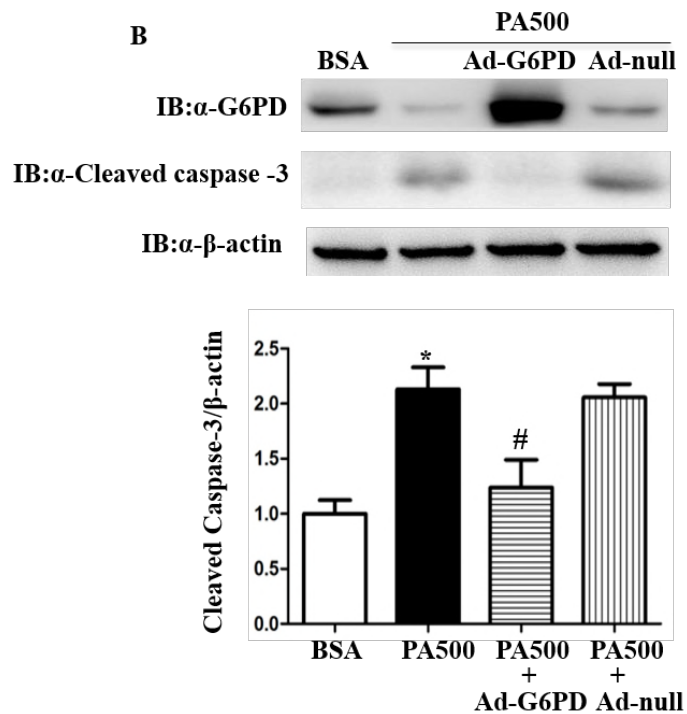

**Figure 6. Elevation of G6PD protein expression reversed the redox imbalance caused by high glucose.**

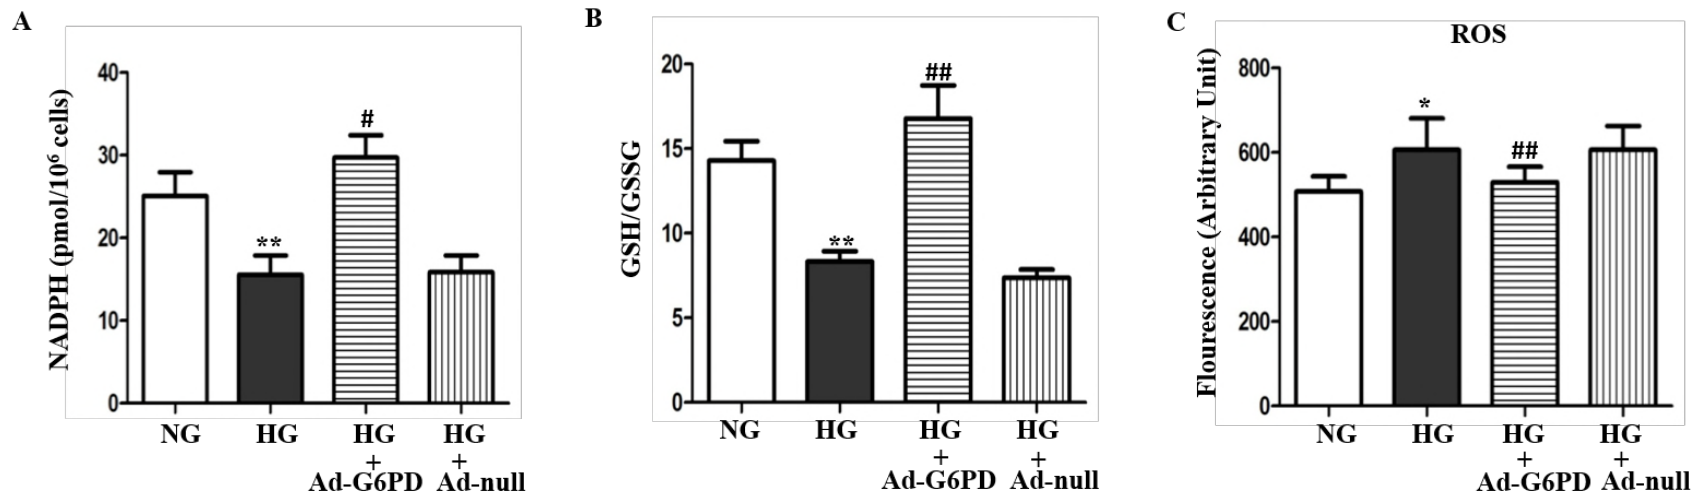

**Figure 7. High glucose promoted G6PD protein degradation through the ubiquitin proteasome pathway.**

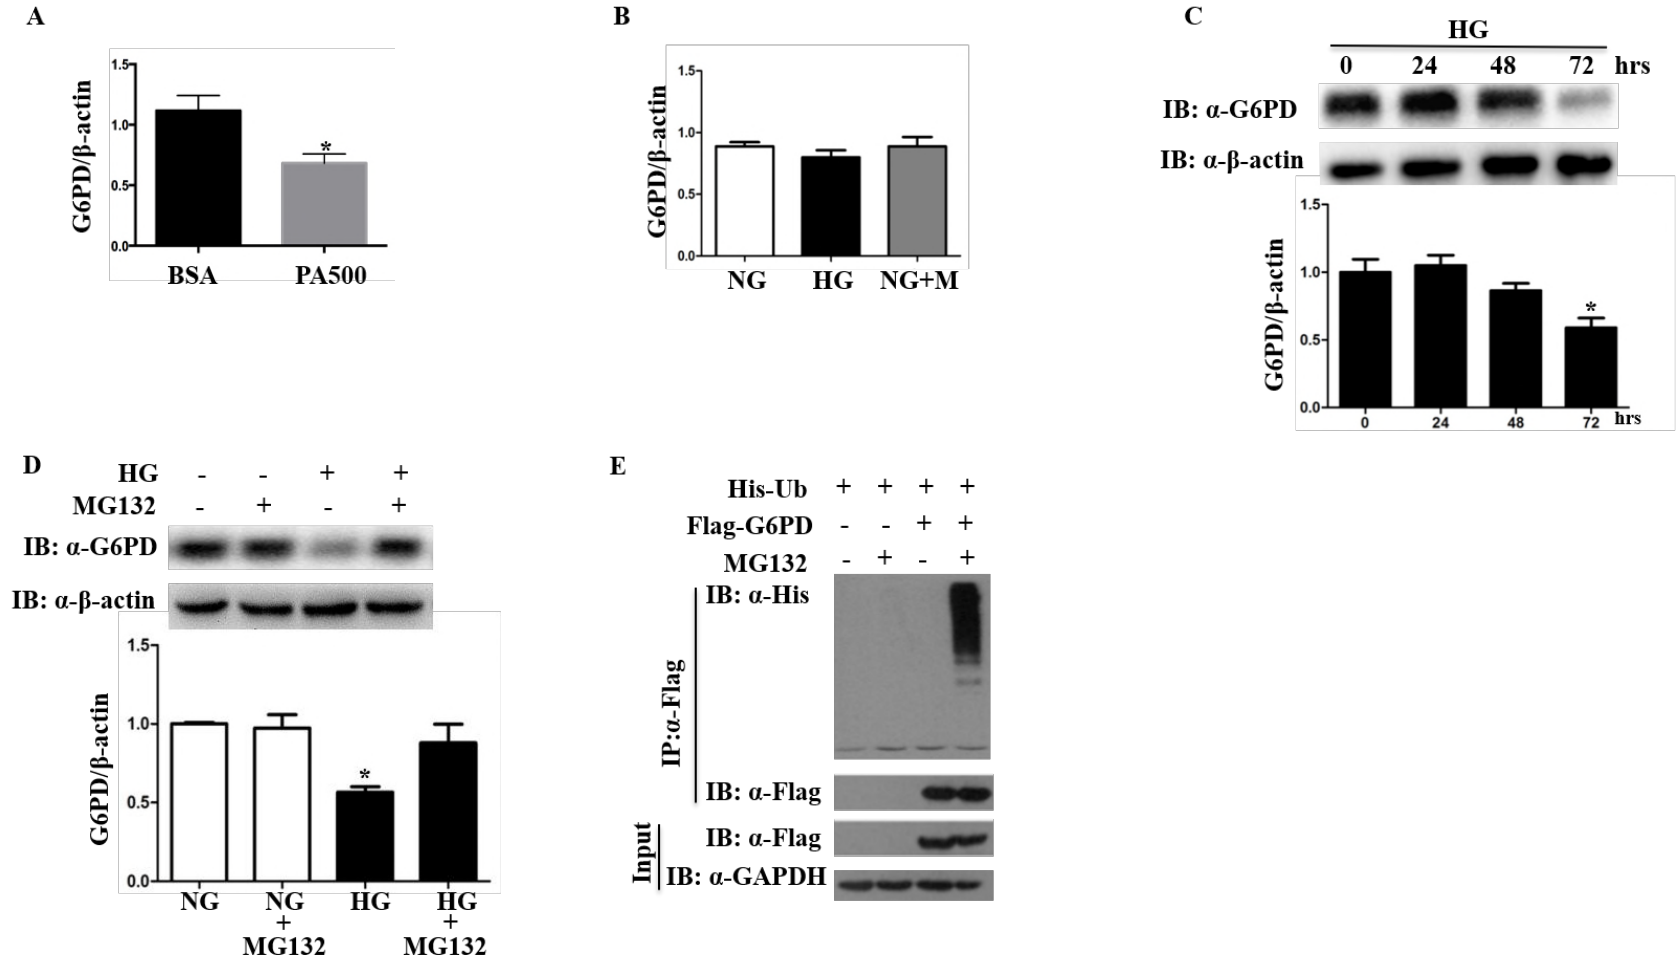

**Figure 8. VHL ubiquitylated and degraded G6PD.**

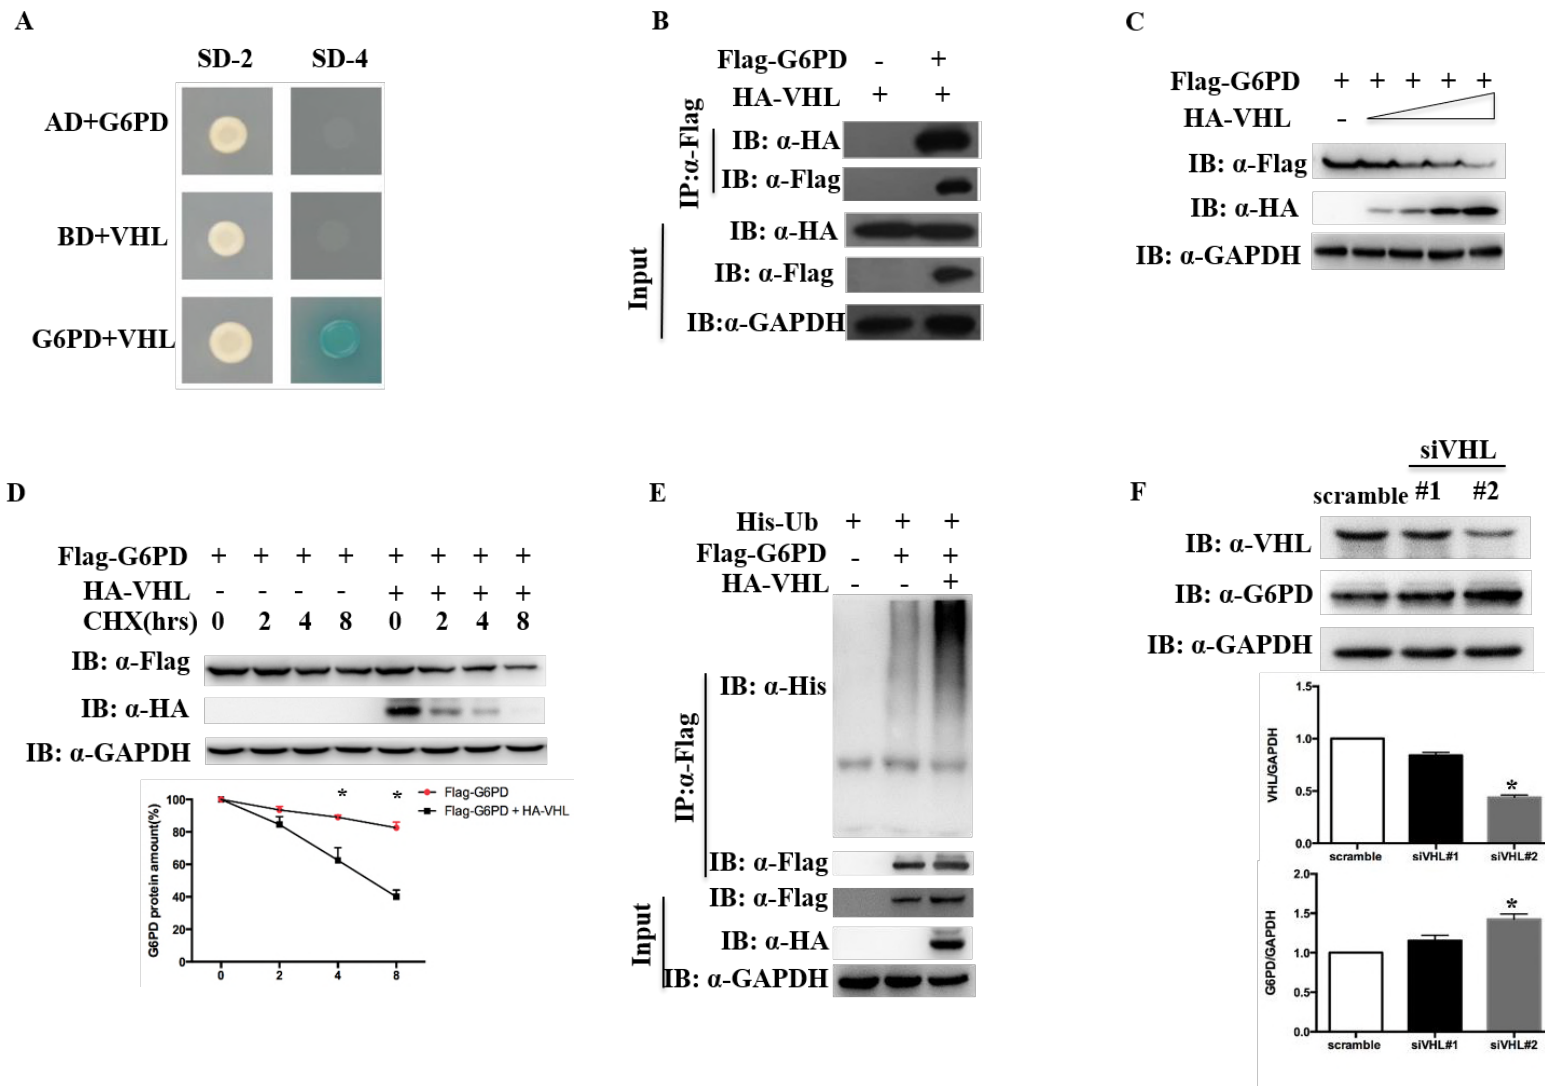

**Figure 9. K<sup>366</sup> and K<sup>403</sup> in G6PD were the major sites for VHL-mediated ubiquitylation.**

**A**

K<sup>97</sup> -K.LK(\*)LEDFFAR-  
 K<sup>366</sup> -LNERK(\*)AEVRLQFHD-  
 K<sup>403</sup> -VYTK(\*)MMTKKPGMF-  
 K<sup>407</sup> -NEAVYTKMMTK(\*)KP-  
 K<sup>408</sup> -K(\*)PGMFFNPEE-

**B**

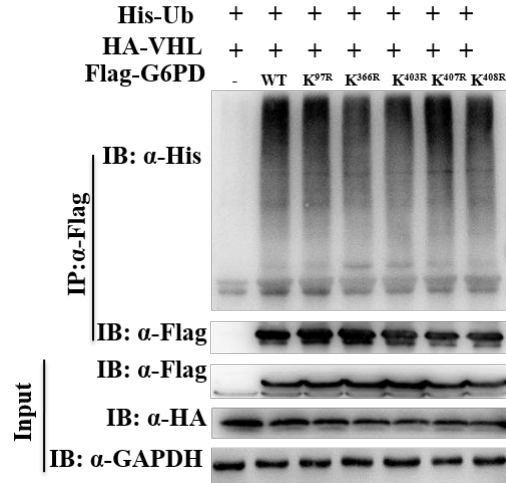

**C**

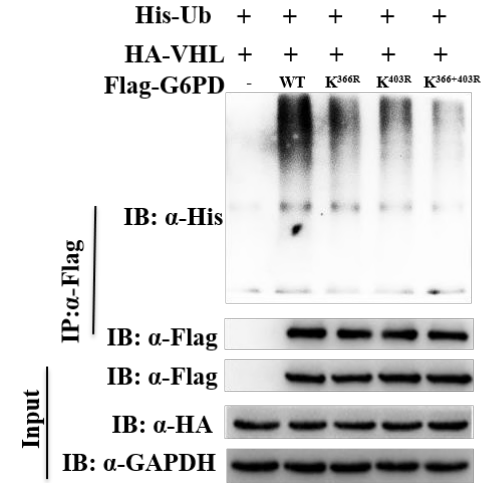

**Figure EV1. Blood glucose was increased in diabetic rodents.**

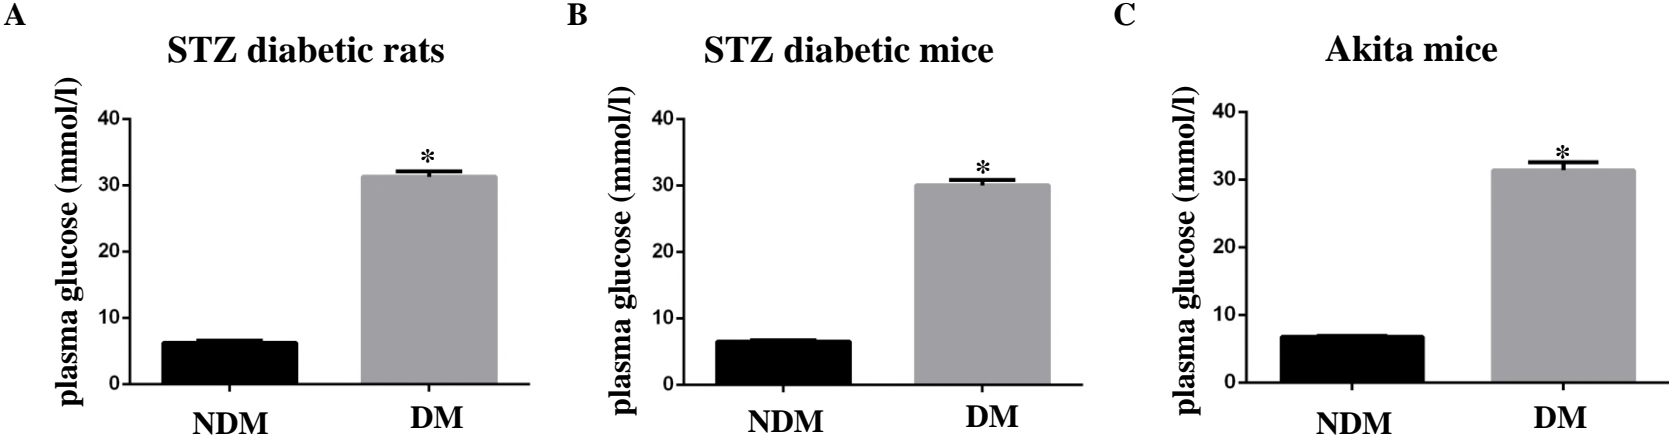



# Figure EV2. Verification of Flag-G6PD, His-Ub and HA-VHL plasmids.

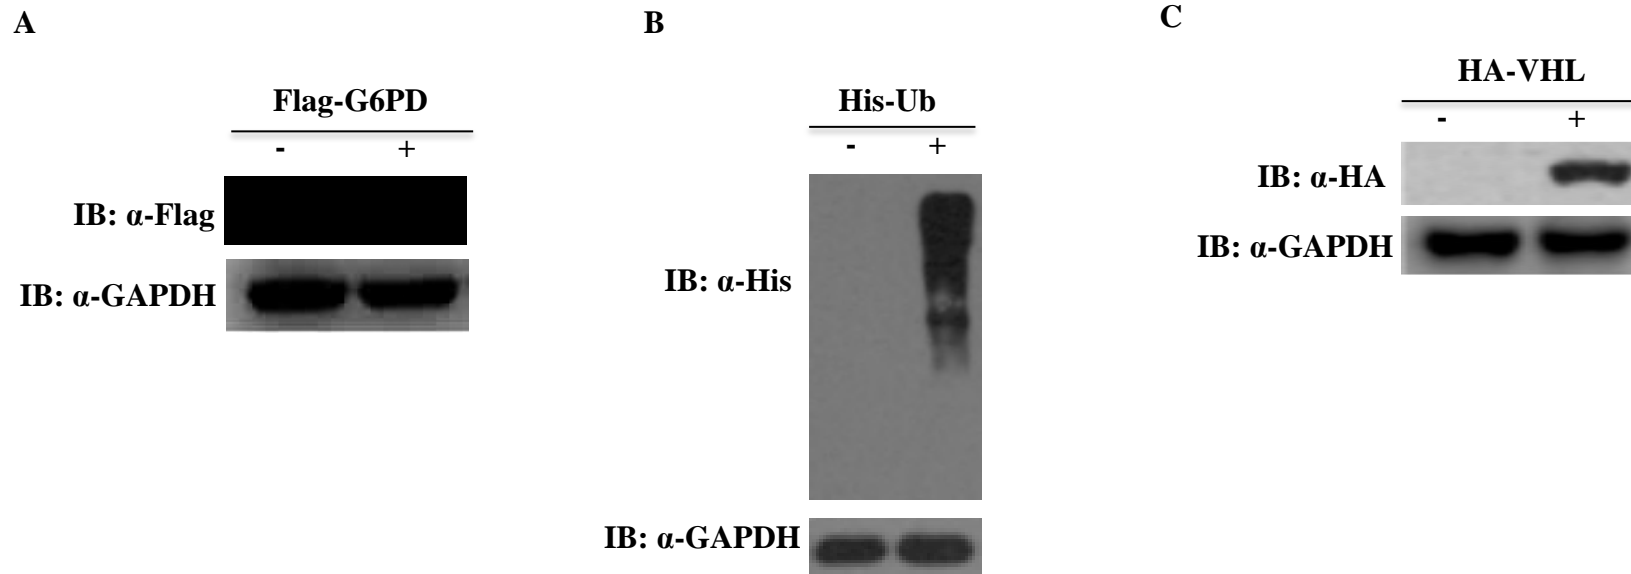

Source: https://www.biorxiv.org/content/10.1101/350694v1.full.pdf
